# Supplementary material for: MiR144/451 Expression Is Repressed by RUNX1 During Megakaryopoiesis and Disturbed by RUNX1/ETO
Source: PLoS Genet. 2016 Mar 18;12(3):e1005946. doi: 10.1371/journal.pgen.1005946 (PMC4798443; doi:10.1371/journal.pgen.1005946)
Supplement: S1 File — (XLSX) [file pgen.1005946.s010.xlsx]

## Sheet: Blatt1
mature	structure	chromosome	start	stop	strand	baseMean	baseMean_control	baseMean_treatment_files_1	log2FoldChange	lfcSE	stat	pvalue	padj	Sample_r824sS1_hs_smallrna_sr_Laussen_A_1_AGTCAA_L007_allspeciesCounts	Sample_r824sS2_hs_smallrna_sr_Laussen_A_2_AGTTCC_L007_allspeciesCounts	Sample_r824sS3_hs_smallrna_sr_Laussen_A_3_ATGTCA_L007_allspeciesCounts	Sample_r824sR1_hs_smallrna_sr_Laussen_B_2_CCGTCC_L007_allspeciesCounts	Sample_r824sR2_hs_smallrna_sr_Laussen_B_2_GTAGAG_L007_allspeciesCounts	Sample_r824sR3_hs_smallrna_sr_Laussen_B_3_GTCCGC_L007_allspeciesCounts
hsa-miR-99a-5p	mirna	chr21	17911421	17911442	1	68.321	103.197	33.4449	-1.54961	0.302933	-5.11535	3.13159e-07	1.94779e-06	117.717	97.6118	94.263	45.0108	31.9783	23.3456
hsa-miR-96-5p	mirna	chr7	129414579	129414601	-1	5319.9	6853.2	3786.6	-0.846657	0.216858	-3.9042	9.4539e-05	0.000413393	6771.52	7005.17	6782.9	4452.03	4261.64	2646.13
hsa-miR-96-3p	mirna	chr7	129414537	129414558	-1	18.2607	25.7591	10.7622	-1.22324	0.441223	-2.77238	0.00556473	0.0168695	28.0278	26.6907	22.5587	6.92475	12.7913	12.5707
hsa-miR-944	mirna	chr3	189547764	189547785	1	62.4838	43.2564	81.7113	0.862048	0.259757	3.31866	0.000904491	0.00332954	36.4362	44.9929	48.34	84.8281	88.4732	71.8326
hsa-miR-942-5p	mirna	chr1	117637277	117637298	1	874.685	1119.58	629.793	-0.825752	0.153009	-5.39677	6.78509e-08	4.51193e-07	1121.11	1121.77	1115.85	590.335	568.147	730.896
hsa-miR-942-3p	mirna	chr1	117637317	117637338	1	37.944	58.5316	17.3563	-1.69868	0.317633	-5.34792	8.8973e-08	5.78325e-07	64.464	57.957	53.174	16.1577	17.0551	18.856
hsa-miR-940	mirna	chr16	2321807	2321827	1	68.6103	52.3926	84.828	0.674967	0.283665	2.37945	0.0173385	0.0454073	50.4501	50.3311	56.3966	92.3299	100.199	61.9556
hsa-miR-92a-1-5p	mirna	chr13	92003578	92003600	1	2967.65	4561.77	1373.53	-1.67884	0.36385	-4.61409	3.9483e-06	2.14996e-05	4501.27	4688.42	4495.62	825.199	906.051	2389.33
hsa-miR-889-3p	mirna	chr14	101514286	101514306	1	59.6317	29.9812	89.2823	1.47811	0.301067	4.90956	9.12792e-07	5.48816e-06	22.4222	31.2663	36.255	98.6776	99.1326	70.0367
hsa-miR-877-5p	mirna	chr6	30552109	30552128	1	193.559	231.23	155.889	-0.56045	0.179601	-3.12052	0.00180531	0.0061878	227.025	224.965	241.7	176.004	147.1	144.563
hsa-miR-874-5p	mirna	chr5	136983307	136983329	-1	80.3487	30.8293	129.868	1.98659	0.31643	6.27812	3.42696e-10	2.9261e-09	25.225	35.8418	31.421	161.577	136.441	91.5865
hsa-miR-874-3p	mirna	chr5	136983271	136983292	-1	679.909	343.15	1016.67	1.52872	0.277797	5.50301	3.7337e-08	2.55342e-07	260.659	367.569	401.222	1153.55	1236.49	659.962
hsa-miR-7976	mirna	chr3	127306001	127306019	-1	239.629	422.305	56.9522	-2.82893	0.219399	-12.894	4.86828e-38	2.34164e-36	468.064	420.188	378.663	70.9786	46.9015	52.9765
hsa-miR-7846-3p	mirna	chr1	12227067	12227087	1	7.10608	10.787	3.42513	-1.377	0.664284	-2.07291	0.0381809	0.08944	11.2111	10.6763	10.4737	6.34768	2.13188	1.79581
hsa-miR-7706	mirna	chr15	85923870	85923893	1	6.62392	1.58262	11.6652	2.17333	0.732715	2.96614	0.00301565	0.00984522	0	1.52518	3.22267	7.50181	14.9232	12.5707
hsa-miR-7705	mirna	chr8	101715230	101715252	-1	91.6834	66.1905	117.176	0.80418	0.308626	2.60568	0.00916925	0.0260971	64.464	64.8203	69.2873	140.226	138.572	72.7305
hsa-miR-7704	mirna	chr2	177053571	177053589	1	515.407	735.681	295.132	-1.29069	0.310758	-4.15337	3.27608e-05	0.000156536	692.287	796.909	717.849	206.588	216.386	462.422
hsa-miR-7703	mirna	chr14	24612698	24612720	-1	3.07253	0.537111	5.60795	2.18688	0.926943	2.35924	0.0183125	0.0476126	0	0	1.61133	5.77062	7.46159	3.59163
hsa-miR-769-5p	mirna	chr19	46522219	46522240	1	6056.86	4505.91	7607.82	0.751118	0.143235	5.24394	1.57183e-07	9.94805e-07	4215.38	4262.89	5039.44	7052.28	8323.94	7447.24
hsa-miR-769-3p	mirna	chr19	46522258	46522280	1	46.9058	33.8755	59.9361	0.837077	0.303599	2.75718	0.00583022	0.0175637	36.4362	29.7411	35.4493	72.1328	56.4949	51.1807
hsa-miR-766-3p	mirna	chrX	118780726	118780747	-1	1570.09	375.628	2764.55	2.8383	0.238287	11.9112	1.03426e-32	4.14567e-31	344.742	373.67	408.473	3472.76	2899.36	1921.52
hsa-miR-760	mirna	chr1	94312436	94312455	1	16.9274	9.89584	23.9589	1.165	0.46891	2.48448	0.0129741	0.0353907	8.40834	8.38851	12.8907	20.1972	20.2529	31.4267
hsa-miR-744-5p	mirna	chr17	11985226	11985247	1	1777.51	935.621	2619.4	1.48155	0.114794	12.9062	4.15207e-38	2.06601e-36	938.932	948.665	919.265	2762.4	2569.99	2525.81
hsa-miR-6855-3p	mirna	chr9	132631929	132631950	1	23.3904	14.3745	32.4063	1.06996	0.399037	2.68134	0.00733269	0.0215063	11.2111	19.8274	12.085	35.7779	30.9123	30.5288
hsa-miR-6852-5p	mirna	chr9	35710713	35710733	-1	16.9364	11.6214	22.2513	0.89347	0.452579	1.97417	0.048362	0.108701	11.2111	9.15111	14.502	23.6595	17.0551	26.0393
hsa-miR-6844	mirna	chr8	125520756	125520776	-1	2.87621	0.254197	5.49822	2.48761	0.987291	2.51963	0.0117478	0.0324753	0	0.762592	0	4.03943	10.6594	1.79581
hsa-miR-6842-3p	mirna	chr8	27290930	27290951	1	114.777	89.6367	139.917	0.65523	0.216073	3.03244	0.00242585	0.00808429	95.2945	78.547	95.0686	155.807	136.441	127.503
hsa-miR-6840-5p	mirna	chr7	99954279	99954302	1	15.6344	22.1339	9.13495	-1.26162	0.50143	-2.51604	0.011868	0.0327448	11.2111	21.3526	33.838	10.9642	7.46159	8.97907
hsa-miR-6836-3p	mirna	chr7	2297150	2297170	-1	2.85509	0.791308	4.91886	1.74853	0.88566	1.97426	0.0483517	0.108701	0	0.762592	1.61133	4.03943	5.32971	5.38744
hsa-miR-6819-3p	mirna	chr22	36682893	36682913	-1	2.00008	0.254197	3.74597	2.15959	0.996438	2.16731	0.0302113	0.0743941	0	0.762592	0	4.6165	2.13188	4.48953
hsa-miR-6793-3p	mirna	chr19	10939692	10939711	1	6.63477	3.56537	9.70416	1.63874	0.760178	2.15573	0.0311048	0.075818	8.40834	2.28778	0	9.81006	8.52754	10.7749
hsa-miR-6789-3p	mirna	chr19	2235828	2235848	-1	3.95481	7.5249	0.384708	-2.69574	0.926777	-2.90872	0.00362909	0.0115094	14.0139	5.33815	3.22267	1.15412	0	0
hsa-miR-6780a-5p	mirna	chr17	40860142	40860164	-1	2.57597	4.46793	0.68401	-1.85075	0.914698	-2.02335	0.0430375	0.0982645	5.60556	4.57555	3.22267	1.15412	0	0.897907
hsa-miR-6769b-3p	mirna	chr1	206648187	206648207	1	10.4822	3.03963	17.9247	2.2961	0.622928	3.68599	0.00022782	0.000926038	2.80278	2.28778	4.02833	23.0825	18.121	12.5707
hsa-miR-6763-5p	mirna	chr12	133158588	133158606	1	3.10604	5.85677	0.355314	-2.59565	0.982533	-2.64179	0.00824687	0.0238005	11.2111	1.52518	4.834	0	1.06594	0
hsa-miR-6753-3p	mirna	chr11	67812399	67812420	1	2.88766	5.17671	0.598605	-2.10017	0.958343	-2.19146	0.0284185	0.0706269	8.40834	2.28778	4.834	0	0	1.79581
hsa-miR-6747-3p	mirna	chr11	62334483	62334503	-1	19.365	25.7908	12.9392	-0.887338	0.43267	-2.05084	0.0402821	0.0934519	33.6334	24.403	19.336	13.8495	15.9891	8.97907
hsa-miR-6746-3p	mirna	chr11	61645688	61645709	-1	1.74674	0.268555	3.22492	1.97346	1.00377	1.96604	0.0492935	0.110134	0	0	0.805666	2.88531	3.19783	3.59163
hsa-miR-6732-3p	mirna	chr1	37945868	37945890	1	5.69967	2.74236	8.65698	1.41538	0.720117	1.96548	0.0493584	0.110134	2.80278	3.81296	1.61133	5.77062	8.52754	11.6728
hsa-miR-6730-5p	mirna	chr1	12639024	12639046	-1	3.42923	0.537111	6.32135	2.3621	0.910321	2.5948	0.00946473	0.0268322	0	0	1.61133	8.07887	6.39565	4.48953
hsa-miR-6726-3p	mirna	chr1	1231490	1231509	-1	2.35472	0.522753	4.18669	1.90169	0.938757	2.02575	0.04279	0.0978542	0	0.762592	0.805666	5.77062	3.19783	3.59163
hsa-miR-671-5p	mirna	chr7	150935535	150935557	1	588.052	463.17	712.934	0.624997	0.130245	4.79862	1.59759e-06	9.25832e-06	482.078	437.728	469.703	699.399	740.83	698.572
hsa-miR-664b-5p	mirna	chrX	153996871	153996894	1	32.0284	52.8244	11.2324	-2.14758	0.367627	-5.84174	5.1659e-09	3.93197e-08	64.464	47.2807	46.7286	9.23299	12.7913	11.6728
hsa-miR-664b-3p	mirna	chrX	153996910	153996931	1	41.4695	3.19694	79.7421	4.63395	0.537489	8.62148	6.60961e-18	1.08383e-16	5.60556	0.762592	3.22267	96.3694	74.6159	68.2409
hsa-miR-664a-5p	mirna	chr1	220373928	220373951	-1	92.0408	32.3688	151.713	2.12945	0.302508	7.0393	1.93208e-12	2.07005e-11	25.225	39.6548	32.2267	181.775	162.023	111.34
hsa-miR-664a-3p	mirna	chr1	220373891	220373913	-1	631.405	210.032	1052.78	2.27975	0.215909	10.5588	4.62348e-26	1.28302e-24	168.167	208.95	252.979	1161.63	1149.09	847.624
hsa-miR-663a	mirna	chr20	26188879	26188900	-1	10.3427	15.3231	5.36236	-1.367	0.558375	-2.44817	0.0143586	0.0385837	14.0139	19.0648	12.8907	7.50181	3.19783	5.38744
hsa-miR-660-5p	mirna	chrX	49777864	49777885	1	1435.75	961.788	1909.71	0.975283	0.210612	4.6307	3.64432e-06	1.99953e-05	810.004	956.291	1119.07	2178.99	2072.19	1477.95
hsa-miR-656-3p	mirna	chr14	101533103	101533123	1	2.3091	0.268555	4.34965	2.34828	0.977138	2.40323	0.0162511	0.0430281	0	0	0.805666	5.19356	4.26377	3.59163
hsa-miR-654-3p	mirna	chr14	101506606	101506627	1	327.318	252.739	401.896	0.664311	0.224877	2.95411	0.00313576	0.0101455	255.053	234.878	268.287	483.001	426.377	296.309
hsa-miR-653-5p	mirna	chr7	93112135	93112155	-1	340.38	97.7466	583.014	2.54511	0.215527	11.8088	3.51664e-32	1.3354e-30	95.2945	89.9859	107.959	634.768	649.159	465.116
hsa-miR-653-3p	mirna	chr7	93112096	93112117	-1	14.4797	4.09949	24.8599	2.26643	0.624785	3.62753	0.000286145	0.00115016	2.80278	3.05037	6.44533	32.8925	30.9123	10.7749
hsa-miR-652-5p	mirna	chrX	109298577	109298601	1	363.621	203.38	523.863	1.34034	0.259793	5.15928	2.47907e-07	1.55535e-06	198.997	195.224	215.919	459.919	723.775	387.896
hsa-miR-652-3p	mirna	chrX	109298617	109298637	1	3853.82	2031.84	5675.79	1.46866	0.185655	7.91069	2.55962e-15	3.65696e-14	1830.22	2109.33	2155.96	6055.69	6500.11	4471.58
hsa-miR-6516-5p	mirna	chr17	75085510	75085531	1	13.26	6.47641	20.0437	1.62316	0.514213	3.15659	0.00159627	0.00556381	8.40834	4.57555	6.44533	19.6201	23.4507	17.0602
hsa-miR-651-5p	mirna	chrX	8095021	8095042	1	141.258	104.981	177.535	0.763188	0.235955	3.23446	0.00121874	0.00432098	114.914	81.5974	118.433	170.81	204.661	157.134
hsa-miR-6503-3p	mirna	chr11	59976557	59976577	-1	61.5416	93.5543	29.5289	-1.65697	0.258332	-6.4141	1.41656e-10	1.26179e-09	84.0834	99.8996	96.68	30.0072	29.8464	28.733
hsa-miR-642b-5p	mirna	chr19	46178236	46178257	-1	64.6711	23.1106	106.232	2.06039	0.424066	4.85866	1.1818e-06	6.98908e-06	16.8167	25.9281	26.587	145.997	121.517	51.1807
hsa-miR-642a-5p	mirna	chr19	46178201	46178222	1	578.557	211.747	945.367	2.08979	0.342447	6.10253	1.04405e-09	8.4166e-09	162.561	232.591	240.089	1186.44	1174.67	474.993
hsa-miR-642a-3p	mirna	chr19	46178236	46178257	1	502.626	306.275	698.978	1.17228	0.278049	4.21609	2.4857e-05	0.000121178	319.517	315.713	283.595	887.522	785.599	423.812
hsa-miR-641	mirna	chr19	40788510	40788533	-1	762.846	1071.4	454.294	-1.22586	0.199661	-6.13971	8.26735e-10	6.8562e-09	1135.13	1033.31	1045.75	384.9	399.728	578.252
hsa-miR-629-5p	mirna	chr15	70371766	70371786	-1	694.839	873.396	516.281	-0.750789	0.128154	-5.85848	4.67118e-09	3.58538e-08	899.693	848.765	871.731	546.478	486.07	516.297
hsa-miR-629-3p	mirna	chr15	70371726	70371747	-1	78.4038	112.457	44.3503	-1.29066	0.303297	-4.25545	2.08631e-05	0.000103812	117.717	90.7485	128.907	53.0897	28.7804	51.1807
hsa-miR-628-5p	mirna	chr15	55665189	55665210	-1	1183.07	345.606	2020.54	2.52885	0.1621	15.6006	7.21205e-55	6.12176e-53	333.531	357.656	345.631	2311.71	1983.72	1766.18
hsa-miR-628-3p	mirna	chr15	55665152	55665172	-1	710.721	548.765	872.677	0.663743	0.241305	2.75064	0.00594794	0.017881	585.781	623.038	437.477	1075.64	898.589	643.799
hsa-miR-627-5p	mirna	chr15	42491828	42491849	-1	161.254	122.351	200.157	0.703395	0.298801	2.35405	0.0185699	0.0481083	134.533	119.727	112.793	200.818	273.947	125.707
hsa-miR-624-5p	mirna	chr14	31483912	31483933	-1	151.722	200.33	103.115	-0.954714	0.197671	-4.82981	1.36666e-06	7.98416e-06	184.984	208.95	207.056	115.989	104.462	88.8928
hsa-miR-6125	mirna	chr12	62654199	62654218	1	6.34523	10.5903	2.10019	-2.05652	0.737797	-2.78737	0.0053137	0.016245	11.2111	6.86333	13.6963	0.577062	2.13188	3.59163
hsa-miR-6087	mirna	chrX	108297774	108297791	1	1472.27	2621.13	323.414	-2.96752	0.280219	-10.59	3.31634e-26	9.57095e-25	2390.77	2757.53	2715.1	207.165	295.266	467.81
hsa-miR-590-5p	mirna	chr7	73605543	73605564	1	69.058	53.8795	84.2365	0.558644	0.266107	2.09932	0.0357888	0.0848	36.4362	65.5829	59.6193	80.7887	93.8029	78.1179
hsa-miR-590-3p	mirna	chr7	73605583	73605603	1	1102.93	863.59	1342.27	0.628446	0.195147	3.22037	0.00128027	0.00451693	810.004	880.031	900.735	1456.5	1546.68	1023.61
hsa-miR-584-5p	mirna	chr5	148441936	148441957	-1	525.132	843.306	206.957	-2.016	0.178773	-11.2769	1.70706e-29	5.59838e-28	866.059	881.557	782.302	172.542	206.793	241.537
hsa-miR-584-3p	mirna	chr5	148441897	148441918	-1	2.21305	4.07078	0.355314	-2.4404	0.984494	-2.47884	0.0131811	0.0358873	2.80278	4.57555	4.834	0	1.06594	0
hsa-miR-582-5p	mirna	chr5	58999492	58999514	-1	4.26342	0.93426	7.59258	2.19252	1.01322	2.16392	0.0304707	0.0747776	2.80278	0	0	12.1183	10.6594	0
hsa-miR-582-3p	mirna	chr5	58999456	58999477	-1	6.57263	0.254197	12.8911	3.73302	0.880334	4.24046	2.23065e-05	0.000110234	0	0.762592	0	16.7348	13.8572	8.08116
hsa-miR-576-5p	mirna	chr4	110409869	110409890	1	415.274	502.908	327.64	-0.608764	0.143106	-4.25393	2.10055e-05	0.000104161	529.726	497.21	481.788	338.158	342.167	302.595
hsa-miR-574-3p	mirna	chr4	38869713	38869734	1	1070.84	611.218	1530.47	1.30815	0.221174	5.91455	3.32781e-09	2.62406e-08	585.781	600.923	646.95	1794.66	1712.97	1083.77
hsa-miR-5695	mirna	chr19	13031187	13031208	1	5.9462	0.791308	11.1011	2.7826	0.805044	3.45645	0.000547341	0.00207846	0	0.762592	1.61133	9.23299	15.9891	8.08116
hsa-miR-5690	mirna	chr6	35632537	35632557	-1	137.346	189.17	85.5208	-1.14012	0.201128	-5.66865	1.43927e-08	1.03844e-07	182.181	181.497	203.834	81.9428	76.7478	97.8719
hsa-miR-5683	mirna	chr6	6169576	6169599	1	20.6446	7.41067	33.8785	2.27887	0.458551	4.96972	6.70503e-07	4.06528e-06	11.2111	4.57555	6.44533	35.2008	34.1101	32.3247
hsa-miR-551a	mirna	chr1	3477274	3477294	-1	33.7189	49.4756	17.9623	-1.47883	0.362222	-4.08266	4.45232e-05	0.000209274	39.2389	49.5685	59.6193	15.0036	24.5167	14.3665
hsa-miR-550a-3-5p	mirna	chr7	29720405	29720424	-1	45.2772	56.4598	34.0947	-0.74693	0.286217	-2.60966	0.00906312	0.025846	50.4501	62.5326	56.3966	32.3155	39.4399	30.5288
hsa-miR-548s	mirna	chr2	11907621	11907643	1	80.2484	96.9409	63.5559	-0.608905	0.248653	-2.44882	0.0143326	0.0385837	95.2945	89.9859	105.542	54.8209	58.6268	77.22
hsa-miR-548e-5p	mirna	chr10	112748698	112748719	1	110.428	66.8209	154.035	1.16582	0.26377	4.41982	9.87816e-06	5.1951e-05	58.8584	74.734	66.8703	184.083	163.089	114.932
hsa-miR-548ay-3p	mirna	chr3	32547797	32547818	-1	38.0882	53.2473	22.929	-1.13581	0.331439	-3.42691	0.000610484	0.00228812	61.6612	46.5181	51.5626	28.276	23.4507	17.0602
hsa-miR-548ax	mirna	chrX	11336776	11336797	-1	65.0482	81.6991	48.3974	-0.731587	0.247419	-2.95687	0.00310777	0.0101002	84.0834	87.6981	73.3156	51.9356	44.7696	48.487
hsa-miR-542-5p	mirna	chrX	133675430	133675452	-1	18.0508	8.87905	27.2226	1.52296	0.489492	3.11131	0.00186258	0.00636896	8.40834	5.33815	12.8907	33.4696	26.6486	21.5498
hsa-miR-542-3p	mirna	chrX	133675394	133675415	-1	62.9133	29.4614	96.3652	1.66478	0.289611	5.74834	9.01254e-09	6.66928e-08	28.0278	29.7411	30.6153	106.179	106.594	76.3221
hsa-miR-532-3p	mirna	chrX	49767810	49767831	1	207.391	170.836	243.946	0.50531	0.204873	2.46646	0.0136456	0.0369429	168.167	165.483	178.858	247.56	286.738	197.54
hsa-miR-524-3p	mirna	chr19	54214308	54214328	1	2.34551	4.19937	0.491656	-2.04405	0.950495	-2.15051	0.0315145	0.0766871	5.60556	4.57555	2.417	0.577062	0	0.897907
hsa-miR-520f-3p	mirna	chr19	54185467	54185488	1	2.38457	4.08514	0.68401	-1.832	0.925805	-1.97882	0.0478368	0.107857	2.80278	3.81296	5.63966	1.15412	0	0.897907
hsa-miR-520a-3p	mirna	chr19	54194187	54194208	1	40.0273	51.2783	28.7762	-0.815565	0.413457	-1.97255	0.0485469	0.108947	56.0556	51.8563	45.923	13.2724	36.242	36.8142
hsa-miR-5189-3p	mirna	chr16	88535392	88535412	1	12.8887	21.6201	4.1573	-2.13917	0.530741	-4.03054	5.56478e-05	0.000253312	28.0278	18.3022	18.5303	4.6165	4.26377	3.59163
hsa-miR-5094	mirna	chr15	90393922	90393943	-1	17.6946	27.2161	8.17318	-1.62587	0.43613	-3.72794	0.000193051	0.000800495	30.8306	27.4533	23.3643	8.07887	7.46159	8.97907
hsa-miR-5091	mirna	chr4	13629499	13629521	1	4.46793	8.93585	0	-4.07264	0.970181	-4.19781	2.69504e-05	0.000130502	11.2111	9.15111	6.44533	0	0	0
hsa-miR-5089-3p	mirna	chr17	45050435	45050457	1	2.06876	3.94517	0.192354	-2.39166	0.997904	-2.39668	0.0165443	0.0437242	5.60556	3.81296	2.417	0.577062	0	0
hsa-miR-505-3p	mirna	chrX	139006319	139006340	-1	396.891	469.633	324.149	-0.529131	0.160008	-3.3069	0.000943329	0.00346368	473.67	459.081	476.149	353.162	340.036	279.249
hsa-miR-504-5p	mirna	chrX	137749921	137749942	-1	38.1331	54.5661	21.7001	-1.2885	0.337264	-3.82046	0.000133201	0.000570355	47.6473	56.4318	59.6193	28.8531	19.187	17.0602
hsa-miR-502-3p	mirna	chrX	49779257	49779278	1	185.287	273.849	96.7264	-1.47015	0.303213	-4.84856	1.24361e-06	7.29481e-06	252.25	305.037	264.259	121.183	115.122	53.8744
hsa-miR-501-3p	mirna	chrX	49774380	49774401	1	4638.97	5992.93	3285.01	-0.842874	0.350321	-2.40601	0.016128	0.0428595	5081.44	6043.54	6853.8	4495.31	3868.3	1491.42
hsa-miR-500b-3p	mirna	chrX	49775330	49775349	1	97.5065	177.909	17.1039	-3.29127	0.363205	-9.06175	1.28379e-19	2.60917e-18	184.984	173.108	175.635	17.3119	27.7145	6.28535
hsa-miR-5001-3p	mirna	chr2	233415203	233415224	-1	24.0849	17.3747	30.795	0.794896	0.37008	2.1479	0.0317216	0.0769316	16.8167	16.777	18.5303	33.4696	31.9783	26.9372
hsa-miR-499a-5p	mirna	chr20	33578211	33578231	1	42.2949	26.2992	58.2906	1.19919	0.316854	3.78467	0.000153911	0.000647504	33.6334	25.9281	19.336	55.975	65.0225	53.8744
hsa-miR-497-5p	mirna	chr17	6921298	6921318	-1	141.011	110.217	171.804	0.663297	0.256225	2.58873	0.00963299	0.0272023	134.533	93.7988	102.32	182.352	204.661	128.401
hsa-miR-493-3p	mirna	chr14	101335453	101335474	1	47.0394	60.1477	33.931	-0.824464	0.323943	-2.54509	0.010925	0.0304928	50.4501	66.3455	63.6476	40.9714	38.3739	22.4477
hsa-miR-489-3p	mirna	chr7	93113259	93113280	-1	198.232	39.1425	357.322	3.08875	0.318877	9.68634	3.44659e-22	7.53551e-21	33.6334	42.7052	41.089	472.614	373.08	226.273
hsa-miR-488-5p	mirna	chr1	176998548	176998568	-1	4.49981	8.80726	0.192354	-3.55613	0.906295	-3.9238	8.71614e-05	0.00038463	8.40834	9.15111	8.86233	0.577062	0	0
hsa-miR-486-5p	mirna	chr8	41517962	41517983	1	3706.79	4611.07	2802.51	-0.70549	0.281431	-2.5068	0.0121831	0.0334224	4686.25	4217.9	4929.07	1952.78	2282.18	4172.57
hsa-miR-4797-5p	mirna	chr3	197020790	197020810	-1	2.1793	3.97389	0.384708	-1.98226	0.977854	-2.02715	0.0426471	0.0976822	5.60556	2.28778	4.02833	1.15412	0	0
hsa-miR-4781-3p	mirna	chr1	54519797	54519818	1	20.5403	12.9385	28.1421	1.18202	0.412879	2.86286	0.0041983	0.0131129	16.8167	9.9137	12.085	31.7384	26.6486	26.0393
hsa-miR-4761-3p	mirna	chr22	19951337	19951357	1	50.7093	31.5411	69.8775	1.14233	0.293756	3.88871	0.000100779	0.000436708	33.6334	32.7915	28.1983	73.2869	78.8797	57.466
hsa-miR-4750-5p	mirna	chr19	50391434	50391455	1	2.14614	0.268555	4.02373	2.21923	0.995134	2.23008	0.0257419	0.0644888	0	0	0.805666	6.34768	2.13188	3.59163
hsa-miR-4746-5p	mirna	chr19	4445984	4446006	1	185.089	224.81	145.369	-0.624282	0.306099	-2.03947	0.0414029	0.0958978	182.181	256.994	235.255	137.918	91.671	206.519
hsa-miR-4745-5p	mirna	chr19	804941	804963	1	10.1918	14.2382	6.14547	-1.08545	0.547813	-1.98143	0.0475429	0.107362	16.8167	12.2015	13.6963	5.19356	4.26377	8.97907
hsa-miR-4742-3p	mirna	chr1	224585929	224585951	-1	11.1953	6.20486	16.1857	1.13133	0.548813	2.06141	0.0392635	0.0916785	2.80278	5.33815	10.4737	15.0036	19.187	14.3665
hsa-miR-4687-5p	mirna	chr11	3877303	3877324	1	30.8529	16.7454	44.9604	1.21066	0.40521	2.98774	0.00281046	0.00921703	5.60556	22.8778	21.753	44.4338	55.429	35.0184
hsa-miR-4677-3p	mirna	chr1	243509527	243509548	1	1153.94	847.891	1459.99	0.774901	0.167213	4.63421	3.58307e-06	1.97609e-05	781.976	818.261	943.435	1494.59	1637.29	1248.09
hsa-miR-4662a-5p	mirna	chr8	125834232	125834253	1	95.2757	161.19	29.3608	-2.42415	0.233494	-10.3821	2.99259e-25	7.99686e-24	156.956	165.483	161.133	30.0072	26.6486	31.4267
hsa-miR-4659a-3p	mirna	chr8	6602733	6602754	1	43.0189	72.0514	13.9864	-2.28967	0.354782	-6.45375	1.09114e-10	9.77956e-10	64.464	81.5974	70.093	17.8889	15.9891	8.08116
hsa-miR-454-3p	mirna	chr17	57215148	57215170	-1	3062.77	1896.34	4229.2	1.14717	0.194416	5.90058	3.62234e-09	2.82543e-08	1869.45	1841.66	1977.91	4899.26	4601.67	3186.67
hsa-miR-4532	mirna	chr20	56470455	56470471	1	25914.3	1840.49	49988.2	4.70408	0.229936	20.4582	5.07847e-93	1.46565e-90	1544.33	1847.76	2129.38	44194.9	65478.7	40290.9
hsa-miR-452-5p	mirna	chrX	151128150	151128171	-1	7518.1	10562.8	4473.39	-1.2285	0.19916	-6.16838	6.89927e-10	5.82202e-09	10737.5	11217.7	9733.25	3714.55	3999.41	5706.2
hsa-miR-452-3p	mirna	chrX	151128106	151128127	-1	1151.79	1519.55	784.021	-0.947247	0.174357	-5.4328	5.54768e-08	3.70616e-07	1617.2	1484	1457.45	675.163	732.302	944.598
hsa-miR-451a	mirna	chr17	27188421	27188442	-1	14019.4	17541.4	10497.3	-0.736527	0.163987	-4.49136	7.07689e-06	3.75439e-05	16676.5	16623.7	19323.9	8725.76	11305.4	11460.9
hsa-miR-449a	mirna	chr5	54466414	54466435	-1	21.4081	15.0295	27.7868	0.902144	0.394596	2.28625	0.0222399	0.0566	16.8167	12.9641	15.3077	31.7384	25.5826	26.0393
hsa-miR-4497	mirna	chr12	110271155	110271171	1	6.98132	13.1717	0.790959	-3.32434	0.796064	-4.17597	2.96718e-05	0.000142721	8.40834	19.8274	11.2793	0.577062	0	1.79581
hsa-miR-4492	mirna	chr11	118781474	118781490	1	10.9134	17.02	4.80684	-1.68848	0.564571	-2.99074	0.00278305	0.00916881	16.8167	21.3526	12.8907	4.03943	3.19783	7.18326
hsa-miR-4488	mirna	chr11	61276071	61276088	1	15.3319	30.0093	0.654616	-4.78234	0.738201	-6.47837	9.27191e-11	8.36211e-10	25.225	36.6044	28.1983	0	1.06594	0.897907
hsa-miR-4477b	mirna	chr9	68415357	68415378	1	34.7187	53.8448	15.5926	-1.65849	0.358403	-4.62744	3.70215e-06	2.02356e-05	67.2667	42.7052	51.5626	19.6201	12.7913	14.3665
hsa-miR-4466	mirna	chr6	157100844	157100861	-1	5.18056	8.58178	1.77935	-1.91661	0.737226	-2.59976	0.00932901	0.0264995	8.40834	6.86333	10.4737	2.30825	2.13188	0.897907
hsa-miR-4449	mirna	chr4	53578887	53578908	1	187.057	359.534	14.5807	-4.58512	0.285203	-16.0767	3.71861e-58	4.12766e-56	361.559	385.109	331.935	9.23299	13.8572	20.6519
hsa-miR-4420	mirna	chr1	31212005	31212026	-1	42.4139	63.2765	21.5513	-1.39366	0.654606	-2.129	0.0332542	0.0801099	58.8584	63.2952	67.676	6.34768	5.32971	52.9765
hsa-miR-425-5p	mirna	chr3	49057632	49057654	-1	14953.1	11264.8	18641.5	0.721313	0.178565	4.03951	5.3564e-05	0.000246156	10622.5	11965.1	11206.8	22337.5	18448.3	15138.7
hsa-miR-425-3p	mirna	chr3	49057592	49057613	-1	837.607	649.058	1026.16	0.654392	0.192078	3.40691	0.000657021	0.00245617	630.626	668.793	647.756	1173.17	1116.04	789.26
hsa-miR-424-5p	mirna	chrX	133680710	133680731	-1	372.993	282.272	463.715	0.710746	0.212412	3.34607	0.000819648	0.0030327	285.884	267.67	293.263	522.241	522.312	346.592
hsa-miR-421	mirna	chrX	73438227	73438249	-1	3528.13	1553.2	5503.05	1.81272	0.184839	9.80705	1.04993e-22	2.40483e-21	1653.64	1511.46	1494.51	6796.06	5083.48	4629.61
hsa-miR-411-5p	mirna	chr14	101489677	101489697	1	633.824	466.811	800.837	0.760659	0.162792	4.67257	2.9745e-06	1.66365e-05	395.192	503.311	501.93	869.633	798.391	734.488
hsa-miR-410-3p	mirna	chr14	101532298	101532318	1	60.3202	29.7019	90.9385	1.53735	0.331251	4.64106	3.46627e-06	1.93121e-05	25.225	24.403	39.4776	91.7529	111.924	69.1388
hsa-miR-409-5p	mirna	chr14	101531651	101531673	1	33.91	48.9636	18.8563	-1.27658	0.539674	-2.36546	0.0180079	0.0469898	36.4362	55.6692	54.7853	32.8925	19.187	4.48953
hsa-miR-409-3p	mirna	chr14	101531683	101531704	1	72.7353	44.8599	100.611	1.14868	0.282056	4.07252	4.65076e-05	0.000217891	44.8445	37.367	52.3683	114.258	107.66	79.9137
hsa-miR-3944-5p	mirna	chr10	135185125	135185145	-1	12.3104	18.5823	6.03852	-1.58695	0.577779	-2.74664	0.00602092	0.0180628	5.60556	25.1655	24.9757	5.77062	4.26377	8.08116
hsa-miR-3942-5p	mirna	chr15	35664522	35664543	-1	39.6443	52.261	27.0275	-0.957552	0.32686	-2.92955	0.00339458	0.0108371	42.0417	51.0937	63.6476	30.5843	29.8464	20.6519
hsa-miR-3940-3p	mirna	chr19	6416445	6416466	-1	42.8171	56.9257	28.7085	-1.00711	0.291663	-3.453	0.000554387	0.00209968	47.6473	59.4822	63.6476	28.276	30.9123	26.9372
hsa-miR-3928-3p	mirna	chr22	31556048	31556069	-1	34.5618	21.5023	47.6214	1.12882	0.389981	2.89454	0.00379711	0.0119373	22.4222	25.1655	16.919	65.208	42.6377	35.0184
hsa-miR-3917	mirna	chr1	26232875	26232894	-1	27.0616	46.0992	8.02391	-2.46726	0.453299	-5.44289	5.24226e-08	3.55144e-07	39.2389	43.4678	55.591	4.03943	7.46159	12.5707
hsa-miR-3912-3p	mirna	chr5	170813682	170813702	-1	57.499	39.8513	75.1467	0.875777	0.266287	3.28885	0.00100597	0.0036657	36.4362	40.4174	42.7003	76.7493	83.1435	65.5472
hsa-miR-383-5p	mirna	chr8	14710992	14711013	-1	20.9815	31.2168	10.7463	-1.4991	0.490118	-3.05866	0.00222331	0.0074471	14.0139	44.9929	34.6437	13.2724	6.39565	12.5707
hsa-miR-378a-3p	mirna	chr5	149112430	149112451	1	18.3714	25.4301	11.3127	-1.15695	0.423479	-2.73203	0.00629463	0.0187281	22.4222	30.5037	23.3643	9.81006	10.6594	13.4686
hsa-miR-375	mirna	chr2	219866370	219866391	-1	813.349	423.343	1203.35	1.49131	0.170488	8.74729	2.18533e-18	3.79931e-17	392.389	465.944	411.695	1379.18	1182.13	1048.76
hsa-miR-374b-5p	mirna	chrX	73438422	73438443	-1	1282.5	609.726	1955.28	1.66316	0.227352	7.31533	2.56742e-13	2.94031e-12	636.231	617.7	575.246	2229.77	2281.12	1354.94
hsa-miR-374b-3p	mirna	chrX	73438392	73438413	-1	286.998	189.443	384.553	1.00778	0.178082	5.65906	1.52208e-08	1.0873e-07	182.181	167.008	219.141	382.592	402.926	368.142
hsa-miR-374a-5p	mirna	chrX	73507160	73507181	-1	1976.6	1160.45	2792.74	1.25575	0.204187	6.15	7.74853e-10	6.46308e-09	1188.38	1154.56	1138.41	3155.95	3178.64	2043.64
hsa-miR-374a-3p	mirna	chrX	73507130	73507151	-1	3302.17	2278.53	4325.81	0.918909	0.165466	5.55347	2.80056e-08	1.96175e-07	2253.44	2048.32	2533.82	4449.73	4831.92	3695.79
hsa-miR-373-3p	mirna	chr19	54292002	54292024	1	49.7169	80.4317	19.0021	-2.01352	0.290987	-6.9196	4.52919e-12	4.6683e-11	86.8862	76.2592	78.1496	20.1972	17.0551	19.754
hsa-miR-371a-5p	mirna	chr19	54290934	54290953	1	5.49165	8.46392	2.51937	-1.56987	0.750652	-2.09135	0.0364969	0.0859136	2.80278	13.7267	8.86233	3.46237	3.19783	0.897907
hsa-miR-3691-5p	mirna	chr6	5148520	5148542	-1	24.9869	34.8642	15.1096	-1.16532	0.401768	-2.90049	0.0037258	0.0117387	33.6334	27.4533	43.506	13.8495	11.7254	19.754
hsa-miR-369-5p	mirna	chr14	101531943	101531964	1	6.63779	2.83925	10.4363	1.37809	0.692155	1.99101	0.0464801	0.105292	0	6.10074	2.417	8.07887	10.6594	12.5707
hsa-miR-3687	mirna	chr21	9826237	9826260	1	342.097	219.805	464.39	1.05989	0.285358	3.71425	0.000203805	0.000837864	218.617	226.49	214.307	597.836	516.982	278.351
hsa-miR-3684	mirna	chr4	99918585	99918605	1	22.0845	29.5727	14.5964	-1.00685	0.384718	-2.61711	0.00886774	0.0254397	25.225	31.2663	32.2267	15.0036	11.7254	17.0602
hsa-miR-3681-5p	mirna	chr2	12339264	12339285	1	4043.1	3154.66	4931.54	0.635115	0.248842	2.55228	0.0107019	0.029928	2951.33	3086.97	3425.69	5872.18	5758.22	3164.22
hsa-miR-3667-5p	mirna	chr22	49937085	49937106	-1	48.0369	64.1426	31.9311	-0.981003	0.276612	-3.54649	0.000390404	0.00151847	64.464	59.4822	68.4816	32.8925	28.7804	34.1205
hsa-miR-3667-3p	mirna	chr22	49937049	49937070	-1	94.8805	148.769	40.9916	-1.86626	0.243939	-7.65052	2.00168e-14	2.51168e-13	126.125	150.993	169.19	35.7779	40.5058	46.6912
hsa-miR-3660	mirna	chr5	89312458	89312478	-1	23.6556	11.0556	36.2557	1.65591	0.425019	3.89607	9.77648e-05	0.000426207	11.2111	10.6763	11.2793	45.5879	36.242	26.9372
hsa-miR-3656	mirna	chr11	118889702	118889718	1	1.81307	3.43379	0.192354	-2.22967	1.03083	-2.16298	0.0305427	0.074827	0	3.05037	7.251	0.577062	0	0
hsa-miR-3648	mirna	chr21	9825859	9825879	1	28.756	49.7501	7.76185	-2.55984	0.392769	-6.51743	7.15221e-11	6.49097e-10	50.4501	48.0433	50.757	8.07887	5.32971	9.87698
hsa-miR-363-3p	mirna	chrX	133303412	133303433	-1	103.467	3.80222	203.133	5.33714	0.458218	11.6476	2.36072e-31	8.51628e-30	2.80278	4.57555	4.02833	229.094	236.639	143.665
hsa-miR-3617-5p	mirna	chr20	44333789	44333810	-1	8.05593	0.268555	15.8433	3.99468	0.861257	4.6382	3.51457e-06	1.95059e-05	0	0	0.805666	18.466	19.187	9.87698
hsa-miR-3617-3p	mirna	chr20	44333748	44333770	-1	2.45943	0	4.91886	3.13301	1.01632	3.08269	0.00205142	0.00690022	0	0	0	4.03943	5.32971	5.38744
hsa-miR-3615	mirna	chr17	72744802	72744822	1	343.949	155.425	532.474	1.73592	0.195818	8.86496	7.65338e-19	1.36343e-17	128.928	160.907	176.441	612.84	470.08	514.501
hsa-miR-3613-5p	mirna	chr13	50570601	50570622	-1	256.573	79.0106	434.136	2.3952	0.364983	6.56249	5.29149e-11	4.95819e-10	89.689	58.7196	88.6233	461.65	617.18	223.579
hsa-miR-3613-3p	mirna	chr13	50570562	50570585	-1	48.2927	14.5892	81.9962	2.35003	0.467844	5.02311	5.08423e-07	3.12193e-06	14.0139	15.2518	14.502	91.7529	118.32	35.9163
hsa-miR-3611	mirna	chr10	35368537	35368557	-1	18.5232	7.9986	29.0478	1.59356	0.456952	3.48737	0.000487802	0.00187207	2.80278	9.9137	11.2793	34.6237	25.5826	26.9372
hsa-miR-361-5p	mirna	chrX	85158686	85158707	-1	2552.67	1481.91	3623.43	1.27259	0.239908	5.30449	1.12986e-07	7.27854e-07	1426.62	1521.37	1497.73	4385.67	4100.68	2383.94
hsa-miR-361-3p	mirna	chrX	85158646	85158668	-1	372.888	169.89	575.885	1.71198	0.230101	7.44013	1.00583e-13	1.18969e-12	128.928	191.411	189.332	624.381	653.422	449.851
hsa-miR-3607-3p	mirna	chr5	85916364	85916383	1	454.603	243.507	665.699	1.43353	0.184519	7.76899	7.91124e-15	1.06691e-13	229.828	250.13	250.562	751.912	699.258	545.927
hsa-miR-3605-3p	mirna	chr1	33798006	33798028	-1	23.2417	16.7801	29.7032	0.789205	0.393251	2.00687	0.044763	0.101882	16.8167	19.8274	13.6963	26.5449	26.6486	35.9163
hsa-miR-34c-5p	mirna	chr11	111384176	111384198	1	58.438	22.2051	94.671	1.94037	0.28854	6.7248	1.75838e-11	1.77436e-10	14.0139	24.403	28.1983	94.6382	90.6051	98.7698
hsa-miR-34b-5p	mirna	chr11	111383675	111383697	1	3.56304	0.537111	6.58896	2.33987	0.936654	2.49812	0.0124855	0.0341871	0	0	1.61133	8.65593	2.13188	8.97907
hsa-miR-34a-5p	mirna	chr1	9211794	9211815	-1	16.6679	4.52536	28.8104	2.56648	0.542989	4.72658	2.28331e-06	1.29769e-05	5.60556	1.52518	6.44533	27.1219	28.7804	30.5288
hsa-miR-342-5p	mirna	chr14	100576010	100576030	1	88.6114	59.5921	117.631	0.982376	0.258937	3.79387	0.000148315	0.000625786	61.6612	51.8563	65.259	142.534	109.792	100.566
hsa-miR-342-3p	mirna	chr14	100576052	100576074	1	4198.16	2135.82	6260.49	1.53141	0.230417	6.64626	3.00633e-11	2.95111e-10	1863.85	2259.56	2284.06	7475.84	6955.27	4350.36
hsa-miR-340-5p	mirna	chr5	179442361	179442382	-1	13816.7	2745.21	24888.3	3.14048	0.234174	13.4109	5.22232e-41	2.79104e-39	2631.81	2617.22	2986.61	29318.8	28621.6	16724.4
hsa-miR-340-3p	mirna	chr5	179442319	179442340	-1	581.613	183.515	979.71	2.39606	0.239799	9.99194	1.65321e-23	3.9108e-22	201.8	173.108	175.635	1211.25	1032.9	694.98
hsa-miR-33a-5p	mirna	chr22	42296953	42296973	1	106.079	72.2237	139.935	0.924521	0.228946	4.03816	5.38721e-05	0.000246786	64.464	72.4463	79.761	153.499	117.254	149.053
hsa-miR-335-3p	mirna	chr7	130136003	130136024	1	1845.33	2963.03	727.616	-2.00978	0.185977	-10.8066	3.20366e-27	9.43446e-26	3127.9	2883.36	2877.84	634.768	638.499	909.58
hsa-miR-331-5p	mirna	chr12	95702221	95702242	1	97.9172	117.794	78.0403	-0.567541	0.228287	-2.48608	0.0129157	0.0352981	123.322	120.49	109.571	92.3299	73.55	68.2409
hsa-miR-331-3p	mirna	chr12	95702256	95702276	1	914.623	599.747	1229.5	1.01701	0.240198	4.23405	2.29515e-05	0.00011265	507.303	591.009	700.93	1447.85	1375.07	865.582
hsa-miR-330-5p	mirna	chr19	46142307	46142328	-1	937.954	665.655	1210.25	0.852498	0.1818	4.6892	2.74278e-06	1.54603e-05	619.415	687.096	690.456	1343.4	1323.9	963.454
hsa-miR-330-3p	mirna	chr19	46142267	46142289	-1	271.683	329.724	213.641	-0.620784	0.221215	-2.80625	0.00501223	0.0154544	313.911	354.605	320.655	246.983	237.705	156.236
hsa-miR-328-3p	mirna	chr16	67236230	67236251	-1	283.888	107.478	460.298	2.04786	0.263573	7.76959	7.87424e-15	1.06691e-13	92.4918	108.288	121.656	557.442	507.388	316.063
hsa-miR-326	mirna	chr11	75046152	75046171	-1	392.883	167.286	618.48	1.83719	0.300704	6.10963	9.98609e-10	8.09546e-09	142.942	178.447	180.469	768.07	729.104	358.265
hsa-miR-324-5p	mirna	chr17	7126661	7126683	-1	170.045	130.085	210.004	0.645971	0.24148	2.67505	0.00747185	0.0218257	95.2945	141.08	153.882	225.631	235.573	168.807
hsa-miR-3200-3p	mirna	chr22	31127597	31127618	1	19.5492	10.7984	28.3	1.20319	0.43239	2.78264	0.00539179	0.0164489	5.60556	10.6763	16.1133	30.5843	25.5826	28.733
hsa-miR-32-5p	mirna	chr9	111808552	111808573	-1	561.647	366.53	756.765	1.03	0.234262	4.39679	1.09862e-05	5.72313e-05	347.545	364.519	387.525	852.321	895.391	522.582
hsa-miR-3196	mirna	chr20	61870140	61870157	1	28.498	17.0601	39.936	1.09144	0.515622	2.11675	0.0342812	0.0821723	11.2111	19.8274	20.1417	30.5843	19.187	70.0367
hsa-miR-3194-3p	mirna	chr20	50069449	50069470	-1	18.5737	11.75	25.3974	1.11936	0.467646	2.39361	0.0166833	0.0439306	14.0139	9.15111	12.085	32.3155	27.7145	16.1623
hsa-miR-3188	mirna	chr19	18392939	18392961	1	17.5355	9.05847	26.0125	1.26765	0.462012	2.74375	0.00607414	0.0181846	2.80278	10.6763	13.6963	30.0072	25.5826	22.4477
hsa-miR-3177-3p	mirna	chr16	1785039	1785059	1	43.4403	55.5638	31.3168	-0.796674	0.292177	-2.72668	0.00639753	0.0189951	61.6612	51.8563	53.174	27.1219	30.9123	35.9163
hsa-miR-3176	mirna	chr16	593336	593354	1	188.599	248.619	128.58	-0.934273	0.305466	-3.05852	0.00222432	0.0074471	243.842	240.979	261.036	94.0611	95.9348	195.744
hsa-miR-3171	mirna	chr14	28102452	28102475	-1	39.4349	29.9872	48.8827	0.72757	0.317152	2.29407	0.0217864	0.0557914	33.6334	29.7411	26.587	55.975	51.1652	39.5079
hsa-miR-3159	mirna	chr11	18409343	18409364	1	39.863	54.8053	24.9207	-1.12468	0.325819	-3.45186	0.00055673	0.00210304	50.4501	64.8203	49.1456	23.0825	20.2529	31.4267
hsa-miR-3154	mirna	chr9	131007235	131007256	-1	6.66629	2.07665	11.2559	1.85124	0.736915	2.51215	0.0119998	0.0330451	0	3.81296	2.417	17.8889	9.59348	6.28535
hsa-miR-3150b-5p	mirna	chr8	96085189	96085210	-1	5.37075	9.78758	0.953919	-2.64648	0.84126	-3.14585	0.00165606	0.00573068	16.8167	6.10074	6.44533	0	1.06594	1.79581
hsa-miR-3150b-3p	mirna	chr8	96085152	96085172	-1	30.909	50.3016	11.5164	-2.03831	0.446587	-4.5642	5.01413e-06	2.69977e-05	50.4501	47.2807	53.174	7.50181	6.39565	20.6519
hsa-miR-3150a-5p	mirna	chr8	96085153	96085174	1	47.3399	74.4217	20.2581	-1.84021	0.324729	-5.6669	1.45401e-08	1.04385e-07	61.6612	91.5111	70.093	22.5054	14.9232	23.3456
hsa-miR-3150a-3p	mirna	chr8	96085190	96085211	1	11.1533	16.6235	5.6832	-1.46695	0.566281	-2.59051	0.00958349	0.0271156	11.2111	14.4893	24.17	5.77062	3.19783	8.08116
hsa-miR-3144-5p	mirna	chr6	120336337	120336358	1	27.7603	41.5906	13.9301	-1.40254	0.577249	-2.4297	0.0151115	0.0403812	42.0417	47.2807	35.4493	30.0072	6.39565	5.38744
hsa-miR-3140-5p	mirna	chr4	153410537	153410557	-1	3.25004	6.30773	0.192354	-2.84503	0.9785	-2.90754	0.00364283	0.0115276	11.2111	6.10074	1.61133	0.577062	0	0
hsa-miR-3130-5p	mirna	chr2	207648000	207648020	-1	5.38474	8.61049	2.15898	-1.61822	0.769953	-2.10171	0.0355785	0.0844404	8.40834	5.33815	12.085	2.88531	0	3.59163
hsa-miR-3127-5p	mirna	chr2	97464025	97464047	1	22.9928	11.4641	34.5215	1.45694	0.472589	3.08289	0.00204999	0.00690022	8.40834	10.6763	15.3077	50.2044	30.9123	22.4477
hsa-miR-3117-3p	mirna	chr1	67094168	67094188	1	4.4816	7.41067	1.55252	-1.76333	0.85814	-2.05482	0.0398961	0.0927151	11.2111	4.57555	6.44533	0	1.06594	3.59163
hsa-miR-30e-5p	mirna	chr1	41220043	41220064	1	121322	71310.2	171334	1.2514	0.214822	5.82531	5.7006e-09	4.30679e-08	75534.9	66244.1	72151.4	173148	215528	125325
hsa-miR-30e-3p	mirna	chr1	41220085	41220106	1	9491.2	5574.47	13407.9	1.25791	0.165422	7.60422	2.86617e-14	3.53494e-13	5227.19	5345.77	6150.46	15342.9	13560.9	11319.9
hsa-miR-30d-5p	mirna	chr8	135817162	135817183	-1	91055.8	63267.6	118844	0.90611	0.1289	7.02957	2.07174e-12	2.19818e-11	62709.4	63041.2	64052.1	121153	129964	105415
hsa-miR-30d-3p	mirna	chr8	135817122	135817143	-1	1792.81	1227.81	2357.81	0.936873	0.175139	5.34931	8.82886e-08	5.76473e-07	1308.9	1137.02	1237.5	2393.65	2744.8	1934.99
hsa-miR-30c-5p	mirna	chr6	72086706	72086728	-1	14.2851	5.41355	23.1566	1.81886	0.512632	3.54809	0.000388033	0.00151847	2.80278	4.57555	8.86233	22.5054	24.5167	22.4477
hsa-miR-30b-5p	mirna	chr8	135812813	135812834	-1	17122.5	9361.48	24883.5	1.40248	0.157106	8.92695	4.37908e-19	8.31449e-18	9341.67	8833.87	9908.89	24536.1	28778.3	21336.1
hsa-miR-30b-3p	mirna	chr8	135812775	135812796	-1	149.018	122.135	175.901	0.525576	0.215883	2.43454	0.0149107	0.0399185	120.52	111.338	134.546	208.319	157.759	161.623
hsa-miR-30a-5p	mirna	chr6	72113298	72113319	-1	437.697	354.693	520.701	0.544245	0.277752	1.95947	0.0500583	0.111472	378.375	340.879	344.825	356.047	747.225	458.83
hsa-miR-3074-3p	mirna	chr9	97848306	97848327	-1	52.4773	38.7196	66.235	0.743003	0.324023	2.29305	0.0218449	0.0557914	36.4362	43.4678	36.255	73.864	79.9457	44.8953
hsa-miR-3065-5p	mirna	chr17	79099686	79099708	1	35.4424	13.8948	56.99	1.89807	0.442013	4.29414	1.75369e-05	8.8792e-05	11.2111	16.777	13.6963	73.2869	67.1543	30.5288
hsa-miR-3065-3p	mirna	chr17	79099726	79099748	1	79.1792	22.988	135.37	2.49733	0.380992	6.55482	5.57083e-11	5.18626e-10	25.225	24.403	19.336	186.391	140.704	79.0158
hsa-miR-301b	mirna	chr22	22007314	22007336	1	11329.7	6018.06	16641.3	1.45735	0.17782	8.19567	2.49201e-16	3.70719e-15	6418.37	5756.05	5879.75	17717	19046.3	13160.6
hsa-miR-301a-3p	mirna	chr17	57228510	57228532	-1	5539.59	2341.62	8737.56	1.88477	0.190152	9.91189	3.69595e-23	8.60202e-22	2430.01	2151.27	2443.59	9518.06	9978.28	6716.34
hsa-miR-29c-5p	mirna	chr1	207975248	207975269	-1	251.716	128.787	374.645	1.50659	0.281633	5.34948	8.82073e-08	5.76473e-07	120.52	128.878	136.963	444.915	445.564	233.456
hsa-miR-29c-3p	mirna	chr1	207975210	207975231	-1	3564.08	731.904	6396.27	3.07429	0.266273	11.5456	7.76658e-31	2.66837e-29	650.245	738.189	807.278	7428.52	7805.89	3954.38
hsa-miR-29b-3p	mirna	chr7	130562226	130562248	-1	6.84904	0.537111	13.161	3.33592	0.82808	4.0285	5.61337e-05	0.00025472	0	0	1.61133	15.5807	14.9232	8.97907
hsa-miR-29b-2-5p	mirna	chr1	207975837	207975858	-1	24.0705	3.8453	44.2956	3.21505	0.505014	6.36625	1.937e-10	1.70432e-09	2.80278	2.28778	6.44533	43.2797	50.0993	39.5079
hsa-miR-29a-5p	mirna	chr7	130561545	130561566	-1	44.2501	15.438	73.0622	2.15525	0.351257	6.13582	8.47221e-10	6.98594e-09	14.0139	12.9641	19.336	81.9428	78.8797	58.364
hsa-miR-29a-3p	mirna	chr7	130561507	130561528	-1	7658.92	2380.25	12937.6	2.42509	0.177724	13.6453	2.15465e-42	1.24367e-40	2401.98	2341.92	2396.86	14004.1	14674.8	10133.8
hsa-miR-296-3p	mirna	chr20	57392681	57392702	-1	9.63975	13.7836	5.49592	-1.22263	0.542159	-2.25512	0.0241257	0.0608783	14.0139	15.2518	12.085	5.77062	5.32971	5.38744
hsa-miR-28-5p	mirna	chr3	188406582	188406603	1	7.39967	1.28535	13.514	2.60361	0.733999	3.54716	0.000389414	0.00151847	0	3.05037	0.805666	17.3119	10.6594	12.5707
hsa-miR-28-3p	mirna	chr3	188406622	188406643	1	64.7131	23.2314	106.195	2.21361	0.311477	7.10682	1.18751e-12	1.31814e-11	28.0278	18.3022	23.3643	123.491	109.792	85.3012
hsa-miR-27b-3p	mirna	chr9	97847787	97847807	1	70981.2	45647	96315.5	1.07256	0.138309	7.75479	8.84889e-15	1.16208e-13	44160.6	45918	46862.4	105940	99362.9	83643.6
hsa-miR-27a-3p	mirna	chr19	13947261	13947281	-1	15788.1	10492.7	21083.4	0.998382	0.188336	5.30107	1.15125e-07	7.38337e-07	9778.9	10593.9	11105.3	21918	24969.7	16362.6
hsa-miR-26b-5p	mirna	chr2	219267380	219267400	1	41804.2	19998.2	63610.1	1.66237	0.136112	12.2133	2.64068e-34	1.19078e-32	19762.4	19859.4	20372.9	67492.6	68238.4	55099.2
hsa-miR-26a-5p	mirna	chr3	38010904	38010925	1	22.3458	12.881	31.8105	1.35621	0.418027	3.24431	0.00117735	0.00420523	16.8167	12.9641	8.86233	38.0861	27.7145	29.6309
hsa-miR-26a-2-3p	mirna	chr12	58218403	58218424	-1	276.629	394.564	158.693	-1.2941	0.165509	-7.81888	5.32961e-15	7.53982e-14	440.037	356.131	387.525	153.499	160.957	161.623
hsa-miR-26a-1-3p	mirna	chr3	38010943	38010964	1	39.7459	60.9457	18.5461	-1.65285	0.382374	-4.32259	1.54205e-05	7.91878e-05	58.8584	58.7196	65.259	17.3119	9.59348	28.733
hsa-miR-25-5p	mirna	chr7	99691233	99691253	-1	1613.67	2383.74	843.605	-1.4401	0.409964	-3.51276	0.000443485	0.00170653	2337.52	2484.53	2329.18	442.607	510.586	1577.62
hsa-miR-24-3p	mirna	chr9	97848346	97848367	1	2.77682	0.522753	5.03089	2.08535	0.922534	2.26046	0.0237928	0.0602333	0	0.762592	0.805666	4.03943	7.46159	3.59163
hsa-miR-24-2-5p	mirna	chr19	13947140	13947161	-1	327.999	152.889	503.109	1.7112	0.24083	7.10543	1.19949e-12	1.32127e-11	170.97	155.569	132.129	605.915	536.169	367.244
hsa-miR-24-1-5p	mirna	chr9	97848309	97848330	1	9.38564	3.78786	14.9834	1.72029	0.590113	2.91519	0.00355473	0.0113233	2.80278	5.33815	3.22267	14.4266	17.0551	13.4686
hsa-miR-23b-5p	mirna	chr9	97847509	97847530	1	6.51623	10.0214	3.01103	-1.57588	0.681542	-2.31223	0.0207649	0.0534114	5.60556	9.15111	15.3077	4.03943	3.19783	1.79581
hsa-miR-23b-3p	mirna	chr9	97847547	97847567	1	2392.73	1436.91	3348.54	1.21019	0.182501	6.63116	3.33057e-11	3.22551e-10	1370.56	1349.79	1590.39	3584.71	3785.16	2675.76
hsa-miR-23a-5p	mirna	chr19	13947444	13947465	-1	243.775	186.99	300.561	0.684396	0.177351	3.859	0.000113851	0.000491878	190.589	160.907	209.473	305.843	299.53	296.309
hsa-miR-23a-3p	mirna	chr19	13947409	13947429	-1	7202.17	3621.09	10783.2	1.55811	0.209719	7.42953	1.08988e-13	1.2683e-12	3399.77	3597.91	3865.59	12010.4	12553.6	7785.75
hsa-miR-2277-5p	mirna	chr5	92956454	92956477	-1	41.7642	31.7492	51.7792	0.647901	0.315314	2.05478	0.0399003	0.0927151	28.0278	36.6044	30.6153	45.5879	63.9565	45.7933
hsa-miR-224-5p	mirna	chrX	151127103	151127123	-1	26565.9	46018.2	7113.64	-2.66198	0.227161	-11.7185	1.02525e-31	3.79343e-30	45671.3	50891.6	41491.8	6131.86	5675.08	9533.98
hsa-miR-224-3p	mirna	chrX	151127056	151127078	-1	184.163	225.718	142.608	-0.656852	0.200676	-3.2732	0.00106338	0.00383613	232.631	231.828	212.696	122.914	134.309	170.602
hsa-miR-223-5p	mirna	chrX	65238737	65238758	1	2429.97	2981.63	1878.31	-0.664678	0.100971	-6.58283	4.61565e-11	4.35319e-10	2998.98	3022.15	2923.76	1903.73	1853.67	1877.52
hsa-miR-223-3p	mirna	chrX	65238779	65238800	1	12072.1	7935.87	16208.3	1.01353	0.267132	3.79412	0.000148166	0.000625786	8111.25	7709.81	7986.57	18633.3	20303	9688.42
hsa-miR-222-5p	mirna	chrX	45606479	45606500	-1	16.1262	2.24832	30.0041	3.47422	0.606462	5.72867	1.01221e-08	7.4521e-08	2.80278	1.52518	2.417	32.8925	31.9783	25.1414
hsa-miR-222-3p	mirna	chrX	45606442	45606462	-1	317.279	89.1534	545.404	2.59262	0.224439	11.5515	7.2512e-31	2.55207e-29	92.4918	83.1225	91.846	650.926	554.29	430.995
hsa-miR-221-5p	mirna	chrX	45605649	45605670	-1	62.669	44.6452	80.6928	0.811545	0.398486	2.03657	0.041693	0.0959538	42.0417	41.9426	49.9513	84.2511	118.32	39.5079
hsa-miR-221-3p	mirna	chrX	45605608	45605630	-1	412.987	37.0061	788.967	4.26594	0.251724	16.9469	2.02856e-64	2.92722e-62	25.225	35.8418	49.9513	873.095	841.028	652.778
hsa-miR-22-5p	mirna	chr17	1617246	1617267	-1	271.182	197.466	344.898	0.786673	0.185689	4.2365	2.27029e-05	0.00011181	184.984	189.885	217.53	331.811	397.596	305.288
hsa-miR-22-3p	mirna	chr17	1617208	1617229	-1	324687	237417	411957	0.792272	0.125021	6.33713	2.34083e-10	2.03483e-09	239425	235907	236919	420892	446916	368063
hsa-miR-219b-5p	mirna	chr9	131154913	131154934	1	29.48	39.6778	19.2821	-0.937589	0.365517	-2.56511	0.0103144	0.0289566	53.2528	33.5541	32.2267	20.1972	22.3848	15.2644
hsa-miR-219a-5p	mirna	chr9	131154955	131154975	-1	21.7488	8.69302	34.8046	1.80106	0.469022	3.84003	0.000123021	0.000528333	5.60556	8.38851	12.085	40.3943	41.5717	22.4477
hsa-miR-215-5p	mirna	chr1	220291258	220291278	-1	470.56	588.173	352.948	-0.728223	0.221389	-3.28934	0.00100424	0.0036657	599.795	546.779	617.946	304.689	289.936	464.218
hsa-miR-214-5p	mirna	chr1	172107997	172108018	-1	5.73098	0	11.462	4.20135	0.951448	4.41575	1.00661e-05	5.26284e-05	0	0	0	13.8495	10.6594	9.87698
hsa-miR-214-3p	mirna	chr1	172107956	172107977	-1	8.23526	0.254197	16.2163	3.95736	0.877131	4.51171	6.43083e-06	3.4497e-05	0	0.762592	0	12.1183	9.59348	26.9372
hsa-miR-212-5p	mirna	chr17	1953622	1953644	-1	403.608	707.779	99.4365	-2.76562	0.288162	-9.59747	8.19347e-22	1.76465e-20	689.484	745.815	688.039	147.151	87.4072	63.7514
hsa-miR-212-3p	mirna	chr17	1953584	1953604	-1	132.877	172.867	92.8868	-0.882318	0.236739	-3.72696	0.000193803	0.000801311	159.759	165.483	193.36	107.911	69.2862	101.463
hsa-miR-210-5p	mirna	chr11	568150	568171	-1	298.173	132.356	463.99	1.77692	0.197884	8.97963	2.71673e-19	5.29762e-18	120.52	153.281	123.267	448.954	411.454	531.561
hsa-miR-210-3p	mirna	chr11	568112	568133	-1	3969.78	2253.84	5685.72	1.32492	0.172386	7.68579	1.5206e-14	1.95913e-13	2155.34	2150.51	2455.67	4648.24	5917.04	6491.87
hsa-miR-20b-5p	mirna	chrX	133303880	133303902	-1	28.6409	14.3063	42.9755	1.53345	0.377852	4.05832	4.94265e-05	0.000228598	14.0139	16.0144	12.8907	50.2044	43.7036	35.0184
hsa-miR-205-5p	mirna	chr1	209605511	209605532	1	230.395	4.43622	456.353	6.09323	0.382147	15.9447	3.09987e-57	3.19508e-55	0	6.86333	6.44533	521.664	385.871	461.524
hsa-miR-204-5p	mirna	chr9	73424947	73424968	-1	112.059	55.4956	168.623	1.62421	0.232325	6.99113	2.72679e-12	2.85127e-11	64.464	48.0433	53.9796	147.151	173.749	184.969
hsa-miR-202-5p	mirna	chr10	135061076	135061097	-1	91.5494	129.745	53.3536	-1.27836	0.345936	-3.69536	0.000219576	0.000897586	106.506	115.151	167.579	31.7384	73.55	54.7723
hsa-miR-202-3p	mirna	chr10	135061042	135061061	-1	11.8396	21.1942	2.4849	-2.81427	0.593645	-4.74065	2.13032e-06	1.21986e-05	25.225	19.8274	18.5303	1.73119	2.13188	3.59163
hsa-miR-200c-3p	mirna	chr12	7072905	7072927	1	135.53	86.2011	184.859	1.05807	0.244282	4.33135	1.48199e-05	7.63756e-05	72.8723	92.2737	93.4573	202.549	211.057	140.971
hsa-miR-200a-3p	mirna	chr1	1103296	1103317	1	8.63417	3.80222	13.4661	1.54071	0.628619	2.45095	0.014248	0.0384296	2.80278	4.57555	4.02833	8.07887	17.0551	15.2644
hsa-miR-19a-3p	mirna	chr13	92003193	92003215	1	25713.9	17655.6	33772.2	0.931115	0.147262	6.32287	2.56756e-10	2.20535e-09	17772.4	16353	18841.3	31254.8	38657.5	31404.3
hsa-miR-1976	mirna	chr1	26881065	26881084	1	22.192	12.5634	31.8207	1.14878	0.430996	2.66541	0.00768951	0.0224161	5.60556	16.777	15.3077	39.2402	31.9783	24.2435
hsa-miR-197-3p	mirna	chr1	110141562	110141583	1	5488.18	3778.01	7198.35	0.918684	0.227907	4.03096	5.55505e-05	0.000253312	3531.5	3886.17	3916.34	8410.1	8282.37	4902.57
hsa-miR-196a-5p	mirna	chr17	46709894	46709915	-1	55.8397	13.0036	98.6758	2.72926	0.358378	7.61559	2.62495e-14	3.26535e-13	8.40834	14.4893	16.1133	111.373	111.924	72.7305
hsa-miR-194-3p	mirna	chr11	64658840	64658861	-1	25.5688	18.7204	32.4173	0.819538	0.364661	2.2474	0.0246147	0.0618799	22.4222	16.0144	17.7247	28.8531	35.1761	33.2226
hsa-miR-192-5p	mirna	chr11	64658675	64658695	-1	70684.9	58437.8	82932	0.502074	0.159313	3.15149	0.00162439	0.00564819	54298.3	55312.3	65702.9	89752.2	87958.3	71085.5
hsa-miR-1911-5p	mirna	chrX	113997755	113997777	1	2.48883	0	4.97765	3.14096	1.01719	3.08787	0.00201598	0.00682878	0	0	0	6.34768	3.19783	5.38744
hsa-miR-191-5p	mirna	chr3	49058105	49058127	-1	492003	314115	669890	1.08044	0.221657	4.87436	1.09163e-06	6.50916e-06	306308	309600	326437	793501	754581	461588
hsa-miR-190b	mirna	chr1	154166189	154166209	-1	37.5529	50.7304	24.3753	-1.0107	0.315131	-3.20723	0.00134021	0.00470542	58.8584	44.9929	48.34	20.7742	24.5167	27.8351
hsa-miR-190a-5p	mirna	chr15	63116170	63116191	1	144.076	34.8426	253.309	2.73603	0.369379	7.40711	1.2908e-13	1.4901e-12	28.0278	43.4678	33.0323	296.033	328.31	135.584
hsa-miR-1908-5p	mirna	chr11	61582681	61582701	-1	626.98	391.807	862.154	1.12231	0.167711	6.69196	2.20206e-11	2.20665e-10	353.15	404.936	417.335	993.701	790.929	801.831
hsa-miR-18b-5p	mirna	chrX	133304114	133304136	-1	24.6886	12.6275	36.7497	1.48113	0.50207	2.95005	0.00317723	0.0102567	14.0139	5.33815	18.5303	44.4338	41.5717	24.2435
hsa-miR-18a-3p	mirna	chr13	92003051	92003073	1	2289.74	2964.76	1614.71	-0.862879	0.26872	-3.21107	0.00132242	0.00465426	2749.53	3096.12	3048.64	1202.6	1279.13	2362.39
hsa-miR-188-3p	mirna	chrX	49768162	49768182	1	14.5701	9.26184	19.8784	1.11851	0.48071	2.32677	0.0199772	0.0514771	11.2111	6.10074	10.4737	21.9284	17.0551	20.6519
hsa-miR-187-3p	mirna	chr18	33484798	33484819	-1	22.2864	0.77695	43.7958	4.68846	0.676146	6.9341	4.08822e-12	4.2441e-11	0	1.52518	0.805666	51.9356	42.6377	36.8142
hsa-miR-186-3p	mirna	chr1	71533325	71533346	-1	10.4761	4.70777	16.2445	1.69602	0.577529	2.93669	0.00331739	0.0106142	5.60556	6.10074	2.417	17.3119	17.0551	14.3665
hsa-miR-185-5p	mirna	chr22	20020676	20020697	1	4156.52	3057.29	5255.76	0.778543	0.131831	5.9056	3.51373e-09	2.7556e-08	3069.04	3011.48	3091.34	5233.95	5821.11	4712.22
hsa-miR-185-3p	mirna	chr22	20020711	20020732	1	381.705	275.581	487.83	0.802583	0.231155	3.47206	0.000516483	0.00197689	232.631	293.598	300.514	565.521	541.499	356.469
hsa-miR-184	mirna	chr15	79502182	79502203	1	23.511	9.59857	37.4235	1.85086	0.418809	4.41933	9.90057e-06	5.1951e-05	8.40834	9.9137	10.4737	44.4338	37.308	30.5288
hsa-miR-181d-5p	mirna	chr19	13985724	13985746	1	372.363	167.998	576.728	1.79465	0.174862	10.2633	1.03171e-24	2.61187e-23	190.589	142.605	170.801	621.496	568.147	540.54
hsa-miR-181c-5p	mirna	chr19	13985539	13985560	1	1999.58	615.987	3383.18	2.45358	0.14916	16.4493	8.49103e-61	1.02105e-58	678.273	544.491	625.197	3232.12	3702.02	3215.4
hsa-miR-181c-3p	mirna	chr19	13985577	13985598	1	564.421	207.571	921.27	2.14363	0.158604	13.5156	1.26479e-41	7.01957e-40	213.011	192.173	217.53	985.622	947.622	830.564
hsa-miR-181b-5p	mirna	chr9	127456004	127456026	1	78.6166	31.3951	125.838	1.9142	0.267785	7.1483	8.78616e-13	9.90502e-12	25.225	34.3166	34.6437	136.187	135.375	105.953
hsa-miR-181b-3p	mirna	chr1	198828016	198828036	-1	5.76051	0.254197	11.2668	3.57724	0.88422	4.04564	5.21796e-05	0.000240559	0	0.762592	0	10.9642	13.8572	8.97907
hsa-miR-181a-3p	mirna	chr1	198828198	198828219	-1	359.113	7.47884	710.747	6.42215	0.350026	18.3476	3.44749e-75	7.10676e-73	8.40834	8.38851	5.63966	801.539	729.104	601.598
hsa-miR-181a-2-3p	mirna	chr9	127454797	127454818	1	404.038	328.201	479.876	0.534906	0.147837	3.61821	0.000296652	0.00118579	302.7	322.576	359.327	499.159	480.74	459.728
hsa-miR-16-2-3p	mirna	chr3	160122585	160122606	1	1644.05	2047.51	1240.58	-0.717068	0.139334	-5.14641	2.65523e-07	1.65865e-06	2264.65	1978.93	1898.96	1139.7	1273.8	1308.25
hsa-miR-15b-3p	mirna	chr3	160122433	160122454	1	1066.55	1539.81	593.28	-1.36805	0.175807	-7.78158	7.16262e-15	9.84349e-14	1605.99	1407.75	1605.69	483.578	675.807	620.454
hsa-miR-15a-5p	mirna	chr13	50623303	50623324	-1	4725.6	2874.69	6576.51	1.18072	0.217298	5.43364	5.52168e-08	3.70595e-07	2721.5	2948.18	2954.38	7929.99	7149.27	4650.26
hsa-miR-1538	mirna	chr16	69599711	69599733	-1	8.66325	2.79979	14.5267	2.09841	0.695415	3.01749	0.00254881	0.00847451	2.80278	0.762592	4.834	19.6201	9.59348	14.3665
hsa-miR-151b	mirna	chr14	100575775	100575792	-1	51.3497	38.5456	64.1537	0.641998	0.298729	2.1491	0.0316265	0.0768301	25.225	39.6548	50.757	62.8998	58.6268	70.9347
hsa-miR-151a-5p	mirna	chr8	141742722	141742742	-1	820.925	1060.9	580.946	-0.864869	0.122869	-7.03897	1.93664e-12	2.07005e-11	1048.24	1050.85	1083.62	616.302	561.751	564.783
hsa-miR-150-5p	mirna	chr19	50004089	50004110	-1	5.99287	1.32842	10.6573	2.20787	0.820603	2.69055	0.00713345	0.0210073	0	0.762592	3.22267	17.8889	9.59348	4.48953
hsa-miR-149-5p	mirna	chr2	241395432	241395454	1	88.0634	118.067	58.0592	-0.995751	0.311986	-3.19166	0.00141458	0.00495448	109.308	128.878	116.016	79.6346	58.6268	35.9163
hsa-miR-148b-5p	mirna	chr12	54731024	54731045	1	1670.88	1277.84	2063.92	0.687992	0.119587	5.75306	8.76432e-09	6.51903e-08	1261.25	1273.53	1298.73	1979.9	2225.69	1986.17
hsa-miR-148b-3p	mirna	chr12	54731062	54731083	1	18570.7	10946.4	26195	1.24885	0.187111	6.67437	2.48299e-11	2.471e-10	10824.3	9826.76	12188.1	29663.9	28243.2	20677.9
hsa-miR-148a-5p	mirna	chr7	25989580	25989601	-1	2796.73	1927.72	3665.74	0.920795	0.157172	5.85853	4.66991e-09	3.58538e-08	1858.24	1830.98	2093.93	3173.84	3656.18	4167.19
hsa-miR-148a-3p	mirna	chr7	25989542	25989563	-1	153053	60964.8	245142	1.9953	0.164276	12.146	6.02294e-34	2.55621e-32	58822	56614.8	67457.6	270283	260584	204558
hsa-miR-146b-5p	mirna	chr10	104196277	104196298	1	370588	243023	498154	1.03127	0.134689	7.6567	1.90774e-14	2.4148e-13	247561	242018	239489	553503	502662	438297
hsa-miR-146b-3p	mirna	chr10	104196313	104196334	1	2084.9	1302.62	2867.19	1.12871	0.126848	8.89813	5.6796e-19	1.04886e-17	1182.77	1378	1347.07	2814.33	2763.99	3023.25
hsa-miR-146a-5p	mirna	chr5	159912379	159912400	1	663.532	62.9619	1264.1	4.24826	0.192135	22.1108	2.48593e-108	1.7936e-105	53.2528	66.3455	69.2873	1403.99	1138.43	1249.89
hsa-miR-1468-5p	mirna	chrX	63005935	63005955	-1	233.705	142.42	324.99	1.21613	0.197514	6.15716	7.40622e-10	6.21348e-09	168.167	134.216	124.878	371.051	299.53	304.39
hsa-miR-145-5p	mirna	chr5	148810224	148810246	1	477.1	329.325	624.875	0.912195	0.191008	4.77568	1.79099e-06	1.03376e-05	313.911	318.764	355.299	671.7	704.588	498.338
hsa-miR-145-3p	mirna	chr5	148810262	148810283	1	332.129	410.86	253.399	-0.695109	0.197265	-3.52374	0.000425501	0.00164611	372.77	439.253	420.558	294.879	263.288	202.029
hsa-miR-144-3p	mirna	chr17	27188566	27188585	-1	1146.14	721.405	1570.86	1.12713	0.134954	8.35201	6.71136e-17	1.01942e-15	798.793	687.858	677.565	1499.21	1661.8	1551.58
hsa-miR-143-5p	mirna	chr5	148808507	148808528	1	5.05482	0	10.1096	3.90196	0.978315	3.98845	6.65064e-05	0.000297117	0	0	0	17.3119	8.52754	4.48953
hsa-miR-143-3p	mirna	chr5	148808541	148808561	1	6508.52	113.058	12904	6.80213	0.165604	41.0746	0	0	117.717	115.914	105.542	13570.2	13661.1	11480.6
hsa-miR-142-5p	mirna	chr17	56408644	56408664	-1	158212	70688.7	245734	1.78379	0.184028	9.69302	3.22827e-22	7.16676e-21	73802.8	68141.4	70122	258450	288247	190506
hsa-miR-142-3p	mirna	chr17	56408606	56408628	-1	26956.2	9238.01	44674.3	2.24155	0.249406	8.98756	2.52782e-19	4.99677e-18	9139.87	9122.89	9451.27	54302.1	51503.1	28217.6
hsa-miR-141-3p	mirna	chr12	7073318	7073339	1	257.846	150.423	365.269	1.26118	0.190457	6.6219	3.54609e-11	3.41134e-10	142.942	132.691	175.635	374.513	389.069	332.226
hsa-miR-140-5p	mirna	chr16	69967006	69967027	1	1060.05	562.011	1558.08	1.44385	0.235927	6.1199	9.36354e-10	7.63366e-09	431.628	599.397	655.007	1822.94	1683.12	1168.18
hsa-miR-140-3p	mirna	chr16	69967045	69967065	1	12941.7	10711.6	15171.8	0.499093	0.154815	3.2238	0.00126502	0.00447407	9815.34	10682.4	11637	16189.5	16383.5	12942.4
hsa-miR-139-5p	mirna	chr11	72326146	72326168	-1	38.6862	56.2564	21.1159	-1.43405	0.345995	-4.14471	3.40244e-05	0.000161504	42.0417	67.1081	59.6193	16.1577	20.2529	26.9372
hsa-miR-139-3p	mirna	chr11	72326110	72326132	-1	1.81021	3.26511	0.355314	-2.11354	1.00807	-2.09663	0.0360267	0.0852237	2.80278	4.57555	2.417	0	1.06594	0
hsa-miR-136-3p	mirna	chr14	101351087	101351108	1	108.196	76.4338	139.957	0.831697	0.20726	4.01282	5.99985e-05	0.000270556	67.2667	83.8851	78.1496	137.918	148.166	133.788
hsa-miR-135b-5p	mirna	chr1	205417489	205417511	-1	593.694	284.859	902.529	1.65215	0.198722	8.31387	9.26321e-17	1.39238e-15	294.292	279.109	281.178	970.618	1039.29	697.674
hsa-miR-132-5p	mirna	chr17	1953259	1953280	-1	109.157	130.35	87.9648	-0.572983	0.265147	-2.161	0.0306951	0.0750654	126.125	159.382	105.542	69.2475	101.264	93.3823
hsa-miR-1306-5p	mirna	chr22	20073595	20073616	1	401.602	293.75	509.453	0.772567	0.157256	4.91281	8.97822e-07	5.42074e-06	255.053	310.375	315.821	546.478	487.136	494.747
hsa-miR-1304-5p	mirna	chr11	93466890	93466911	-1	96.5314	128.85	64.2125	-0.998161	0.241834	-4.12747	3.66775e-05	0.000173527	120.52	154.044	111.988	65.208	56.4949	70.9347
hsa-miR-1293	mirna	chr12	50627965	50627986	-1	22.8583	33.915	11.8016	-1.50654	0.401054	-3.75646	0.000172335	0.000718728	33.6334	35.0792	33.0323	8.07887	13.8572	13.4686
hsa-miR-1292-5p	mirna	chr20	2633425	2633449	1	16.1022	22.3079	9.89651	-1.1089	0.439995	-2.52026	0.0117269	0.0324753	22.4222	25.1655	19.336	10.3871	8.52754	10.7749
hsa-miR-129-1-3p	mirna	chr7	127847973	127847994	1	2.73107	4.72212	0.740022	-1.91105	0.909083	-2.10218	0.0355376	0.0844404	5.60556	5.33815	3.22267	1.15412	1.06594	0
hsa-miR-1286	mirna	chr22	20236668	20236688	-1	29.2359	42.6912	15.7807	-1.40996	0.430984	-3.2715	0.00106979	0.00384966	33.6334	39.6548	54.7853	11.5412	10.6594	25.1414
hsa-miR-128-3p	mirna	chr3	35786019	35786039	1	632.601	398.31	866.893	1.11127	0.241055	4.61002	4.02639e-06	2.18424e-05	426.023	379.771	389.137	1031.21	984.93	584.537
hsa-miR-1277-3p	mirna	chrX	117520403	117520424	1	4.98104	0.522753	9.43933	2.9385	0.84818	3.46447	0.000531268	0.00202809	0	0.762592	0.805666	11.5412	9.59348	7.18326
hsa-miR-1273h-3p	mirna	chr16	24214507	24214528	1	37.4645	52.5864	22.3426	-1.23955	0.344355	-3.59961	0.000318694	0.00127038	44.8445	54.9066	58.008	17.3119	19.187	30.5288
hsa-miR-1271-5p	mirna	chr5	175794963	175794984	1	43.5325	75.5929	11.4721	-2.56524	0.525366	-4.88276	1.04609e-06	6.26353e-06	28.0278	89.9859	108.765	15.0036	14.9232	4.48953
hsa-miR-1269a	mirna	chr4	67142608	67142629	1	112.593	6.84185	218.344	4.74867	0.39358	12.0653	1.61058e-33	6.64019e-32	5.60556	6.86333	8.05666	270.065	220.65	164.317
hsa-miR-126-5p	mirna	chr9	139565068	139565088	1	187568	249218	125918	-0.958057	0.3437	-2.78748	0.00531192	0.016245	236714	249169	261771	78254.2	87958.3	211542
hsa-miR-126-3p	mirna	chr9	139565105	139565126	1	34578.5	48625.5	20531.5	-1.20507	0.366936	-3.28415	0.00102291	0.00371803	43885.9	52651.7	49339	12002.3	13858.3	35734
hsa-miR-1257	mirna	chr20	60528677	60528697	-1	21.4026	37.9258	4.87932	-2.67796	0.667652	-4.01101	6.04586e-05	0.000271781	16.8167	66.3455	30.6153	1.73119	2.13188	10.7749
hsa-miR-1255a	mirna	chr4	102251522	102251544	-1	33.0541	23.6968	42.4113	0.871003	0.362218	2.40463	0.0161887	0.0429416	28.0278	22.1152	20.9473	51.9356	44.7696	30.5288
hsa-miR-1249	mirna	chr22	45596839	45596860	-1	32.5198	22.2224	42.8171	0.868357	0.408813	2.12409	0.0336626	0.0809585	19.6195	22.8778	24.17	24.8137	47.9674	55.6702
hsa-miR-1248	mirna	chr3	186504464	186504490	1	90.0071	31.6463	148.368	2.06116	0.49347	4.17688	2.95536e-05	0.000142628	19.6195	35.8418	39.4776	249.291	142.836	52.9765
hsa-miR-1246	mirna	chr2	177465752	177465770	-1	41.6385	78.5823	4.69482	-3.87035	0.443642	-8.72402	2.68489e-18	4.55799e-17	67.2667	83.8851	84.595	4.03943	1.06594	8.97907
hsa-miR-1237-3p	mirna	chr11	64136155	64136175	1	9.08732	5.00504	13.1696	1.30486	0.578646	2.25502	0.024132	0.0608783	5.60556	4.57555	4.834	10.3871	13.8572	15.2644
hsa-miR-1226-3p	mirna	chr3	47891098	47891119	1	76.8233	122.232	31.4144	-1.88957	0.312645	-6.04381	1.5052e-09	1.19341e-08	134.533	140.317	91.846	39.8173	31.9783	22.4477
hsa-miR-1179	mirna	chr15	89151352	89151372	1	4.70772	1.07422	8.34121	2.09208	0.848837	2.46464	0.0137152	0.0370619	0	0	3.22267	8.07887	10.6594	6.28535
hsa-miR-10b-5p	mirna	chr2	177015057	177015079	1	5556.89	2161.75	8952.02	2.0236	0.233303	8.67372	4.18236e-18	6.93696e-17	1987.17	2224.48	2273.59	7176.92	12227.4	7451.73
hsa-miR-10a-5p	mirna	chr17	46657266	46657288	-1	1.3031e+06	301041	2.30516e+06	2.90756	0.20955	13.8753	8.94668e-44	5.37919e-42	263473	289220	350429	2.51547e+06	2.65497e+06	1.74503e+06
hsa-miR-10a-3p	mirna	chr17	46657226	46657247	-1	1179.61	468.287	1890.93	1.98947	0.231831	8.58154	9.36096e-18	1.50087e-16	470.867	466.706	467.286	2204.95	2176.65	1291.19
hsa-miR-107	mirna	chr10	91352513	91352535	-1	1422.05	760.176	2083.93	1.43253	0.246107	5.82077	5.85776e-09	4.40247e-08	689.484	744.29	846.755	2453.09	2418.62	1380.08
hsa-miR-103a-3p	mirna	chr5	167987909	167987931	-1	222.168	161.43	282.905	0.801387	0.210839	3.80093	0.000144151	0.000611795	159.759	173.871	150.66	322.578	301.662	224.477
hsa-miR-103a-2-5p	mirna	chr20	3898151	3898173	1	20.7175	9.84616	31.5888	1.36425	0.512292	2.66302	0.00774422	0.0225024	0	19.0648	10.4737	36.3549	28.7804	29.6309
hsa-miR-100-5p	mirna	chr11	122022983	122023004	-1	57.8566	90.5728	25.1405	-1.77227	0.398539	-4.44692	8.71098e-06	4.60437e-05	78.4779	87.6981	105.542	36.932	27.7145	10.7749
hsa-miR-1	mirna	chr20	61151558	61151579	1	18.2969	0.254197	36.3396	5.13802	0.788197	6.51869	7.09221e-11	6.47725e-10	0	0.762592	0	40.3943	30.9123	37.7121
hsa-let-7f-2-3p	mirna	chrX	53584157	53584178	-1	37.2297	48.1454	26.3141	-0.80281	0.332062	-2.41765	0.0156211	0.041589	58.8584	39.6548	45.923	28.276	30.9123	19.754
hsa-let-7a-5p	mirna	chr9	96938244	96938265	1	30.0565	23.0311	37.0819	0.702175	0.333738	2.10397	0.0353813	0.0842495	25.225	22.1152	21.753	39.8173	37.308	34.1205
novelmirna_chr9_97847787_97847807_plus	novelmirna	chr9	97847787	97847807	1	70981.5	45647.5	96315.5	1.07254	0.13831	7.75465	8.85854e-15	1.16208e-13	44160.6	45919.5	46862.4	105940	99362.9	83643.6
novelmirna_chr8_141742721_141742742_minus	novelmirna	chr8	141742721	141742742	-1	821.075	1060.9	581.245	-0.864141	0.122744	-7.04017	1.92e-12	2.07005e-11	1048.24	1050.85	1083.62	616.302	561.751	565.681
novelmirna_chr5_149112430_149112451_plus	novelmirna	chr5	149112430	149112451	1	18.3714	25.4301	11.3127	-1.15695	0.423479	-2.73203	0.00629463	0.0187281	22.4222	30.5037	23.3643	9.81006	10.6594	13.4686
novelmirna_chr20_47897285_47897302_plus	novelmirna	chr20	47897285	47897302	1	1783.24	1330.09	2236.39	0.74327	0.173339	4.28796	1.80321e-05	9.09801e-05	1292.08	1368.85	1329.35	2202.65	2659.53	1846.99
novelmirna_chr19_58024411_58024428_minus	novelmirna	chr19	58024411	58024428	-1	1300.11	488.342	2111.88	2.08393	0.187802	11.0964	1.30577e-28	4.09616e-27	400.798	500.26	563.966	2161.1	1806.77	2367.78
novelmirna_chr13_50623305_50623324_minus	novelmirna	chr13	50623305	50623324	-1	4725.6	2874.69	6576.51	1.18072	0.217298	5.43364	5.52168e-08	3.70595e-07	2721.5	2948.18	2954.38	7929.99	7149.27	4650.26
novelmirna_chr10_104196314_104196335_plus	novelmirna	chr10	104196314	104196335	1	2084.9	1302.62	2867.19	1.12871	0.126848	8.89813	5.6796e-19	1.04886e-17	1182.77	1378	1347.07	2814.33	2763.99	3023.25
novelmirna_chr1_76255215_76255232_plus	novelmirna	chr1	76255215	76255232	1	653.212	539.703	766.721	0.498994	0.238527	2.09198	0.0364401	0.0859136	549.345	616.174	453.59	648.041	1013.71	638.412
RNA5SP99	rrna	chr2	81723338	81723451	-1	13.1693	22.0795	4.25917	-2.23824	0.550577	-4.06525	4.79802e-05	0.000224063	16.8167	23.6404	25.7813	3.46237	2.13188	7.18326
RNA5SP87	rrna	chr2	22561758	22561875	-1	21.1708	37.8392	4.50246	-2.87022	0.536993	-5.34498	9.04259e-08	5.85133e-07	30.8306	48.0433	34.6437	3.46237	1.06594	8.97907
RNA5SP74	rrna	chr1	204531541	204531649	-1	21054.1	39409.7	2698.53	-3.84003	0.180228	-21.3065	9.87259e-101	3.84685e-98	38958.7	38707.7	40562.9	2364.22	2369.59	3361.76
RNA5SP65	rrna	chr1	166975196	166975314	1	47.7786	83.8727	11.6845	-2.75776	0.390039	-7.07046	1.54417e-12	1.68805e-11	92.4918	64.0577	95.0686	7.50181	9.59348	17.9581
RNA5SP518	rrna	chrY	9928019	9928137	-1	4.47606	8.56742	0.384708	-3.09751	0.873242	-3.54713	0.00038945	0.00151847	8.40834	7.62592	9.668	1.15412	0	0
RNA5SP491	rrna	chr21	38224211	38224328	1	11.5603	20.9083	2.21221	-3.06142	0.635318	-4.81872	1.4448e-06	8.40663e-06	19.6195	21.3526	21.753	0.577062	4.26377	1.79581
RNA5SP472	rrna	chr19	32734871	32734989	-1	19.3431	32.0124	6.67389	-2.18022	0.556839	-3.91536	9.02708e-05	0.000397137	14.0139	31.2663	50.757	5.77062	10.6594	3.59163
RNA5SP463	rrna	chr19	7951862	7951981	-1	246.546	441.468	51.6238	-3.04637	0.268787	-11.3338	8.92865e-30	2.99629e-28	538.134	357.656	428.614	38.6632	47.9674	68.2409
RNA5SP462	rrna	chr19	453134	453245	1	7.56759	12.244	2.89115	-1.86561	0.671615	-2.77781	0.00547274	0.0166607	14.0139	11.4389	11.2793	1.15412	2.13188	5.38744
RNA5SP460	rrna	chr18	70419187	70419286	1	2.04975	4.09949	0	-3.09776	1.03031	-3.00663	0.00264159	0.00876278	2.80278	3.05037	6.44533	0	0	0
RNA5SP444	rrna	chr17	64263861	64263966	1	8.49132	14.9894	1.99324	-2.50829	0.691716	-3.62618	0.000287645	0.00115298	22.4222	14.4893	8.05666	1.15412	2.13188	2.69372
RNA5SP442	rrna	chr17	39874406	39874512	1	7.03284	2.53123	11.5344	1.9484	0.701795	2.77631	0.00549806	0.0167025	2.80278	0.762592	4.02833	11.5412	9.59348	13.4686
RNA5SP440	rrna	chr17	36888055	36888173	-1	49.8939	83.6914	16.0965	-2.27861	0.456316	-4.9935	5.92959e-07	3.62559e-06	75.6751	75.4966	99.9026	9.23299	8.52754	30.5288
RNA5SP394	rrna	chr15	50274640	50274758	1	26.0201	45.4886	6.55172	-2.62813	0.45918	-5.72352	1.04338e-08	7.62551e-08	58.8584	38.1296	39.4776	4.6165	4.26377	10.7749
RNA5SP383	rrna	chr14	24627812	24627931	1	39.3762	65.6361	13.1164	-2.27041	0.341428	-6.64973	2.93627e-11	2.90208e-10	58.8584	66.3455	71.7043	12.6954	9.59348	17.0602
RNA5SP382	rrna	chr14	20883146	20883257	1	14.6355	21.0089	8.26212	-1.24386	0.617909	-2.01302	0.0441128	0.10056	19.6195	16.0144	27.3927	3.46237	4.26377	17.0602
RNA5SP355	rrna	chr12	28658327	28658461	1	34.3095	43.55	25.069	-0.832131	0.382976	-2.1728	0.0297952	0.0734947	33.6334	51.0937	45.923	19.0431	37.308	18.856
RNA5SP336	rrna	chr11	21022427	21022543	-1	703.787	1322.42	85.1565	-3.84934	0.350088	-10.9954	4.02344e-28	1.20955e-26	2001.19	880.031	1086.04	54.8209	110.858	89.7907
RNA5SP303	rrna	chr10	19922612	19922741	-1	1342.78	2516.49	169.071	-3.84224	0.24471	-15.7012	1.48388e-55	1.42749e-53	2418.8	2450.21	2680.45	150.613	120.451	236.15
RNA5SP298	rrna	chr10	327955	328065	-1	2.11404	4.22809	0	-3.09046	1.02839	-3.00516	0.00265441	0.00878513	5.60556	3.05037	4.02833	0	0	0
RNA5SP289	rrna	chr9	98667287	98667423	1	53.1282	31.1409	75.1154	1.19854	0.27644	4.33564	1.45338e-05	7.51695e-05	25.225	33.5541	34.6437	81.3658	70.3522	73.6284
RNA5SP288	rrna	chr9	97904731	97904823	-1	155.658	274.211	37.1047	-2.84855	0.239935	-11.8721	1.65173e-32	6.44175e-31	269.067	255.468	298.097	34.0467	28.7804	48.487
RNA5SP276	rrna	chr8	117034911	117035004	-1	3.65332	6.10436	1.20228	-1.99767	0.85815	-2.32788	0.0199183	0.0514171	2.80278	10.6763	4.834	0.577062	2.13188	0.897907
RNA5SP273	rrna	chr8	91523356	91523468	1	61.2158	111.963	10.4685	-3.30913	0.324583	-10.195	2.08652e-24	5.19113e-23	106.506	118.202	111.182	11.5412	6.39565	13.4686
RNA5SP259	rrna	chr8	28387928	28388036	1	7.26881	12.8703	1.66732	-2.34191	0.746565	-3.13692	0.00170734	0.00589399	19.6195	6.10074	12.8907	2.30825	0	2.69372
RNA5SP258	rrna	chr8	25994396	25994514	1	12.6711	22.6866	2.65571	-2.6159	0.643676	-4.064	4.82384e-05	0.000224542	36.4362	10.6763	20.9473	4.03943	2.13188	1.79581
RNA5SP246	rrna	chr7	130287672	130287790	-1	34.8667	60.9235	8.80979	-2.65552	0.480537	-5.52615	3.27341e-08	2.26006e-07	67.2667	51.8563	63.6476	4.03943	5.32971	17.0602
RNA5SP242	rrna	chr7	128337493	128337610	1	104.742	148.444	61.039	-1.25231	0.374829	-3.34101	0.000834736	0.00308063	123.322	147.18	174.83	43.2797	38.3739	101.463
RNA5SP218	rrna	chr6	134578173	134578281	1	208.539	373.991	43.0867	-3.09926	0.21845	-14.1875	1.09463e-45	7.52169e-44	364.362	351.555	406.056	35.7779	40.5058	52.9765
RNA5SP214	rrna	chr6	117381845	117381962	1	6.98317	11.4814	2.4849	-1.93849	0.665239	-2.91397	0.00356861	0.0113425	14.0139	9.15111	11.2793	1.73119	2.13188	3.59163
RNA5SP208	rrna	chr6	68177124	68177201	-1	46.9496	73.5312	20.3681	-1.84847	0.371538	-4.97518	6.51859e-07	3.96892e-06	56.0556	82.36	82.178	12.1183	20.2529	28.733
RNA5SP204	rrna	chr6	17722017	17722134	-1	32.9686	51.6988	14.2383	-1.83576	0.362605	-5.06271	4.13343e-07	2.55989e-06	44.8445	44.9929	65.259	12.6954	13.8572	16.1623
RNA5SP202	rrna	chr6	4428197	4428315	1	96.9255	139.724	54.1275	-1.35408	0.288831	-4.68813	2.75713e-06	1.54807e-05	142.942	130.403	145.826	36.3549	53.2971	72.7305
RNA5SP175	rrna	chr4	190938851	190938969	1	20.2719	34.6926	5.85124	-2.4636	0.45893	-5.36814	7.95521e-08	5.26577e-07	30.8306	29.7411	43.506	5.77062	6.39565	5.38744
RNA5SP150	rrna	chr3	181540660	181540778	-1	61.0407	108.455	13.6268	-2.96332	0.328102	-9.03172	1.68989e-19	3.38682e-18	100.9	119.727	104.737	9.23299	12.7913	18.856
RNA5SP143	rrna	chr3	142310519	142310633	-1	4.46665	8.03031	0.902982	-2.58807	0.834361	-3.10186	0.00192306	0.00654476	8.40834	7.62592	8.05666	0.577062	2.13188	0
RNA5SP132	rrna	chr3	51728481	51728598	-1	2547.34	4602.62	492.074	-3.12761	0.363854	-8.59578	8.26994e-18	1.34084e-16	4837.6	3566.64	5403.6	249.868	431.707	794.648
RNA5SP111	rrna	chr2	165752187	165752287	-1	2.08383	4.16766	0	-3.00245	1.03919	-2.88922	0.00386197	0.0121148	0	6.86333	5.63966	0	0	0
RNA5S9	rrna	chr1	228763895	228764013	-1	12.274	18.5948	5.95311	-1.46528	0.53574	-2.73505	0.00623701	0.0186336	25.225	15.2518	15.3077	4.6165	4.26377	8.97907
RNA5-8SP6	rrna	chrY	10037764	10037915	1	21798	29014.2	14581.9	-0.985609	0.178181	-5.53149	3.17519e-08	2.20279e-07	25892.1	31531.7	29618.7	13355.5	12774.2	17616
RNA5-8SP5	rrna	chr2	133010727	133010878	-1	415.71	709.156	122.263	-2.52966	0.182226	-13.882	8.14363e-44	5.10924e-42	703.498	749.628	674.343	99.2547	136.441	131.094
RNA5-8SP4	rrna	chr19	24187160	24187309	-1	849.278	1116.95	581.611	-0.934643	0.217342	-4.30033	1.70541e-05	8.69579e-05	983.776	1240.74	1126.32	504.352	487.136	753.344
RNA5-8SP3	rrna	chr9	111754689	111754849	-1	270.452	471.224	69.6806	-2.73389	0.174776	-15.6423	3.74951e-55	3.38158e-53	451.248	491.109	471.315	76.1722	68.2203	64.6493
RNA5-8SP2	rrna	chr16	33965426	33965577	1	125424	147656	103191	-0.512465	0.195973	-2.61498	0.00892336	0.0255484	133642	148185	161141	79084.6	108647	121841
5S_rRNA	rrna	chr16	34982891	34983026	1	14.3274	23.0598	5.59502	-1.95144	0.533877	-3.65522	0.000256966	0.00103866	25.225	20.59	23.3643	2.30825	6.39565	8.08116
U8	snorna	chr18	56486115	56486248	-1	3909.05	835.033	6983.07	3.02557	0.238767	12.6716	8.49314e-37	3.95342e-35	877.27	963.154	664.675	9018.33	6495.85	5435.03
U3	snorna	chr21	30552747	30552960	-1	37.9796	50.4619	25.4973	-0.94552	0.316123	-2.99098	0.0027808	0.00916881	58.8584	44.9929	47.5343	20.7742	28.7804	26.9372
snoU2_19	snorna	chrX	20154424	20154503	-1	16.2996	8.45617	24.143	1.48856	0.522161	2.85078	0.00436125	0.0135631	11.2111	6.10074	8.05666	13.8495	29.8464	28.733
snoU13	snorna	chr21	43024746	43024843	-1	99.5425	63.0444	136.041	1.04327	0.220808	4.72479	2.30356e-06	1.30354e-05	50.4501	69.3959	69.2873	130.993	146.034	131.094
SNORD98	snorna	chr10	70514929	70514995	1	1798.04	1118.21	2477.86	1.13743	0.174374	6.52291	6.89576e-11	6.33795e-10	1048.24	1073.73	1232.67	2414.43	2915.35	2103.8
SNORD97	snorna	chr11	10823014	10823155	-1	210.029	169.446	250.613	0.559036	0.196163	2.84986	0.00437387	0.0135731	168.167	182.26	157.911	270.642	272.881	208.314
SNORD96A	snorna	chr5	180668814	180668892	-1	1526.34	1138.08	1914.61	0.738461	0.249917	2.95483	0.00312843	0.0101446	1011.8	1142.36	1260.06	2567.93	1839.82	1336.09
SNORD95	snorna	chr9	84503833	84503900	1	1502.06	1900.73	1103.4	-0.782918	0.155546	-5.03335	4.81981e-07	2.97221e-06	1684.47	2042.22	1975.49	1121.23	973.205	1215.77
SNORD93	snorna	chr7	22896232	22896305	1	47556	58084.4	37027.6	-0.645721	0.162828	-3.96566	7.31917e-05	0.000325974	55469.8	55757.7	63025.7	31816.9	35910.5	43355.4
SNORD92	snorna	chr2	29136530	29136614	1	3074.34	1534.32	4614.36	1.55759	0.290521	5.36138	8.25889e-08	5.44181e-07	1463.05	1536.62	1603.28	6504.64	4641.11	2697.31
SNORD91A	snorna	chr17	2233570	2233664	-1	256.397	201.952	310.843	0.610319	0.171749	3.55354	0.000380081	0.00149852	196.195	192.936	216.724	291.416	347.497	293.616
SNORD90	snorna	chr9	125642492	125642602	-1	416.417	220.962	611.872	1.45442	0.173847	8.36611	5.9554e-17	9.14218e-16	213.011	222.677	227.198	660.736	657.686	517.194
SNORD88B	snorna	chr19	51302289	51302379	-1	120.097	152.64	87.5533	-0.787565	0.386614	-2.03709	0.0416415	0.0959538	123.322	152.518	182.081	52.5127	62.8906	147.257
SNORD85	snorna	chr1	31441011	31441083	-1	9802.97	2327.69	17278.2	2.86497	0.201083	14.2477	4.63537e-46	3.34442e-44	2231.01	2420.47	2331.6	21188	17613.6	13033.1
SNORD84	snorna	chr6	31508878	31508955	-1	1328.71	565.828	2091.58	1.87114	0.221556	8.44542	3.02942e-17	4.75158e-16	639.034	559.743	498.707	2526.38	2207.57	1540.81
SNORD83B	snorna	chr22	39709824	39709916	-1	1233.13	2148.26	318.004	-2.7391	0.180187	-15.2014	3.46272e-52	2.77595e-50	1961.95	2294.64	2188.19	278.144	288.87	386.998
SNORD83A	snorna	chr22	39711218	39711312	-1	2742.41	4399.7	1085.13	-2.00315	0.190394	-10.5211	6.90641e-26	1.88037e-24	4548.91	4326.19	4324.01	923.299	958.282	1373.8
SNORD78	snorna	chr2	72987663	72987731	1	22597.7	26735.6	18459.9	-0.527373	0.240741	-2.19062	0.0284792	0.0706269	26242.4	25873.2	28091.2	13723.1	16095.7	25560.7
SNORD73A	snorna	chr4	152024979	152025043	1	185.58	239.387	131.773	-0.852453	0.183959	-4.63393	3.58791e-06	1.97609e-05	246.645	253.181	218.336	132.724	144.968	117.626
SNORD71	snorna	chr16	71792305	71792390	-1	540.635	345.584	735.686	1.08167	0.177371	6.09835	1.07167e-09	8.59122e-09	341.939	350.792	344.02	806.733	800.522	599.802
SNORD70	snorna	chr2	203142831	203142915	1	546.439	706.73	386.149	-0.861996	0.251187	-3.43169	0.000599834	0.00225995	686.681	751.916	681.594	284.492	337.904	536.05
SNORD68	snorna	chr16	89627842	89627925	1	2053.25	3183.99	922.505	-1.7808	0.117278	-15.1844	4.48819e-52	3.40866e-50	3178.35	3295.16	3078.45	975.235	923.106	869.174
SNORD66	snorna	chr6	51329488	51329563	1	3074.54	2512.66	3636.41	0.527451	0.181728	2.90242	0.00370296	0.0116923	2160.94	2923.78	2453.25	4231.02	3420.61	3257.61
SNORD61	snorna	chrX	135961358	135961430	-1	1319.06	793.944	1844.17	1.20734	0.183019	6.59681	4.20097e-11	4.01457e-10	804.398	742.765	834.67	1982.21	2090.31	1460
SNORD60	snorna	chr16	2205024	2205106	-1	3894.52	5137.28	2651.77	-0.948031	0.170413	-5.56315	2.6495e-08	1.86499e-07	5134.69	5091.07	5186.07	2300.17	2427.15	3227.98
SNORD58B	snorna	chr18	47018034	47018099	-1	5441.01	721.7	10160.3	3.73197	0.307249	12.1464	5.99509e-34	2.55621e-32	695.09	761.83	708.181	11227.9	13830.6	5422.46
SNORD58A	snorna	chr18	47017653	47017717	-1	1472.95	1013.25	1932.65	0.92171	0.174403	5.28496	1.25734e-07	8.02807e-07	927.72	1077.54	1034.48	2038.18	2183.05	1576.72
SNORD55	snorna	chr1	45241536	45241615	1	698.649	990.541	406.758	-1.27636	0.14615	-8.73317	2.4763e-18	4.25393e-17	1017.41	1004.33	949.881	388.363	373.08	458.83
SNORD54	snorna	chr8	56986394	56986460	-1	397.245	218.544	575.945	1.38275	0.221218	6.25061	4.08853e-10	3.47044e-09	215.814	229.54	210.279	705.747	588.4	433.689
SNORD53_SNORD92	snorna	chr2	29150849	29150926	1	336.174	487.269	185.079	-1.38466	0.202916	-6.82379	8.86703e-12	9.07456e-11	496.092	461.368	504.347	158.692	163.089	233.456
SNORD53	snorna	chr2	29149933	29150010	1	490.301	867.954	112.647	-2.92301	0.16096	-18.1598	1.07369e-73	1.93667e-71	829.623	924.262	849.978	121.183	99.1326	117.626
SNORD52	snorna	chr6	31804853	31804919	1	26033.3	13446.3	38620.3	1.50443	0.226856	6.63168	3.31882e-11	3.22551e-10	14098	13018.2	13222.6	41676.6	47675.3	26508.9
SNORD51	snorna	chr14	104263609	104263685	-1	520.949	414.71	627.189	0.585071	0.211378	2.76788	0.00564217	0.0170684	375.573	427.052	441.505	701.708	712.049	467.81
SNORD5	snorna	chr11	93466394	93466466	-1	1807.76	945.206	2670.31	1.48579	0.197098	7.53831	4.76107e-14	5.70886e-13	958.551	972.305	904.763	3087.28	2913.22	2010.41
SNORD4B	snorna	chr17	27050700	27050771	1	339.418	234.033	444.803	0.910338	0.161398	5.64032	1.69734e-08	1.20653e-07	221.42	247.842	232.838	436.259	491.399	406.752
SNORD46	snorna	chr7	132437783	132437886	1	374.28	579.284	169.275	-1.75985	0.225895	-7.79057	6.67063e-15	9.34535e-14	596.992	584.146	556.715	122.337	172.683	212.804
SNORD45C	snorna	chr1	76252757	76252835	1	1454.51	737.524	2171.49	1.54425	0.183143	8.43195	3.39965e-17	5.27494e-16	720.315	681.757	810.5	1801.59	2573.18	2139.71
SNORD45A	snorna	chr1	76253574	76253657	1	2457.88	629.599	4286.17	2.73988	0.208249	13.1568	1.55594e-39	8.01867e-38	633.428	610.836	644.533	3608.37	5564.22	3685.91
SNORD41	snorna	chr19	12817263	12817332	-1	571.579	322.728	820.429	1.32682	0.254068	5.2223	1.76715e-07	1.11353e-06	322.32	318.764	327.101	1002.36	927.37	531.561
SNORD38A	snorna	chr1	45243515	45243584	1	4627.36	7535.16	1719.55	-2.09431	0.277848	-7.5376	4.78705e-14	5.70886e-13	7519.86	7454.34	7631.27	1183.55	1418.77	2556.34
SNORD36A	snorna	chr9	136217311	136217383	1	353.149	239.983	466.314	0.944623	0.264544	3.57076	0.000355948	0.00141108	238.236	229.54	252.174	613.417	477.542	307.982
SNORD33	snorna	chr19	49993872	49993956	1	19533.2	34431	4635.46	-2.8412	0.279788	-10.1548	3.1534e-24	7.71247e-23	33526.9	35655.8	34110.3	3445.64	3486.7	6974.04
SNORD28	snorna	chr18	56267863	56267930	1	6.34423	2.75672	9.93175	1.55357	0.745747	2.08324	0.0372295	0.0874954	2.80278	3.05037	2.417	4.03943	9.59348	16.1623
SNORD23	snorna	chr19	48259110	48259219	1	35.6783	25.8021	45.5544	0.831677	0.310803	2.6759	0.00745289	0.0218145	28.0278	24.403	24.9757	47.8962	44.7696	43.9974
SNORD21	snorna	chr1	93302846	93302940	1	2993.02	4279.64	1706.41	-1.31205	0.222468	-5.89771	3.68578e-09	2.85945e-08	3879.05	4563.35	4396.52	1588.65	1292.99	2237.58
SNORD20	snorna	chr2	232321155	232321234	-1	1125.51	1597.57	653.454	-1.28541	0.138665	-9.26985	1.86402e-20	3.84254e-19	1538.73	1699.06	1554.94	639.385	599.059	721.917
SNORD2	snorna	chr10	58355723	58355791	-1	1908.03	2683.44	1132.62	-1.23676	0.159236	-7.76685	8.04599e-15	1.07503e-13	2707.49	2644.67	2698.18	1236.64	1230.1	931.13
SNORD19B	snorna	chr3	52724760	52724843	1	1951.19	646.298	3256.09	2.31792	0.139814	16.5787	9.9433e-62	1.30438e-59	611.006	696.247	631.642	3582.4	3133.87	3051.99
SNORD19	snorna	chr3	52725394	52725469	1	1004.44	823.335	1185.54	0.518497	0.157351	3.29516	0.000983672	0.00360264	756.751	934.175	779.079	1272.42	1218.37	1065.82
SNORD18C	snorna	chr15	66793588	66793656	-1	681.445	234.973	1127.92	2.20772	0.308686	7.15198	8.55346e-13	9.71861e-12	207.406	249.368	248.145	1365.91	1402.78	615.066
SNORD18B	snorna	chr15	66794358	66794429	-1	5749.08	2633.55	8864.62	1.7318	0.218037	7.94266	1.97891e-15	2.88441e-14	2544.92	2744.57	2611.16	9773.7	10592.3	6227.88
SNORD18	snorna	chr15	91298473	91298542	-1	5.55186	1.44266	9.66107	2.5276	0.814258	3.10417	0.00190813	0.00650928	2.80278	1.52518	0	13.2724	8.52754	7.18326
SNORD15B	snorna	chr11	75115465	75115610	1	304.969	358.469	251.469	-0.498558	0.184442	-2.70306	0.0068704	0.0203155	378.375	382.821	314.21	286.223	247.299	220.885
SNORD15A	snorna	chr11	75111435	75111582	1	2892.58	3459.31	2325.85	-0.572339	0.104482	-5.4779	4.30415e-08	2.92966e-07	3371.75	3392.77	3613.41	2291.51	2351.47	2334.56
SNORD14E	snorna	chr11	122928785	122928869	-1	2134.04	3070.56	1197.52	-1.34944	0.158436	-8.51727	1.63358e-17	2.5904e-16	3192.37	3135.02	2884.29	1212.41	1012.64	1367.51
SNORD14D	snorna	chr11	122929617	122929703	-1	1666.37	2105.75	1226.98	-0.776354	0.118762	-6.53706	6.27386e-11	5.80332e-10	2090.87	2042.22	2184.16	1250.49	1143.76	1286.7
SNORD14B	snorna	chr11	17097326	17097415	-1	430.001	124.689	735.313	2.50174	0.323702	7.72854	1.08785e-14	1.41421e-13	128.928	138.792	106.348	1020.82	773.874	411.241
SNORD14A	snorna	chr11	17096201	17096291	-1	179.401	286.679	72.1216	-1.98098	0.196289	-10.0922	5.98411e-24	1.43918e-22	274.673	305.799	279.566	66.9392	65.0225	84.4033
SNORD12C	snorna	chr20	47895477	47895565	1	1394.92	1104.15	1685.7	0.605107	0.185841	3.25604	0.00112977	0.00404532	1079.07	1182.78	1050.59	1890.46	1849.41	1317.23
SNORD127	snorna	chr14	45580086	45580171	1	165.389	234.458	96.3191	-1.27888	0.179745	-7.11494	1.1196e-12	1.25239e-11	227.025	253.181	223.17	96.9464	95.9348	96.076
SNORD121B	snorna	chr9	33934294	33934374	-1	106.325	69.467	143.183	1.00717	0.307566	3.27464	0.00105798	0.00382622	61.6612	69.3959	77.344	177.735	162.023	89.7907
SNORD121A	snorna	chr9	33952767	33952848	-1	43.8033	28.5696	59.037	1.01293	0.38123	2.65702	0.00788357	0.0228433	28.0278	34.3166	23.3643	76.1722	65.0225	35.9163
SNORD12	snorna	chr20	47897220	47897309	1	1855.18	1426.62	2283.75	0.672784	0.169872	3.96054	7.47805e-05	0.000332025	1370.56	1482.48	1426.84	2247.08	2697.9	1906.26
SNORD11B	snorna	chr2	203156055	203156144	1	375.071	304.077	446.066	0.530087	0.233232	2.27279	0.0230389	0.0585301	238.236	348.505	325.489	462.227	532.971	343
SNORD119	snorna	chr20	2443608	2443683	-1	11682.2	16011.5	7352.89	-1.11771	0.143534	-7.78706	6.85852e-15	9.5162e-14	14837.9	17173.6	16023.1	8011.35	7601.23	6446.07
SNORD118	snorna	chr17	8076772	8076905	-1	166.19	214.057	118.322	-0.852169	0.21795	-3.90993	9.23215e-05	0.000404924	224.222	217.339	200.611	91.7529	137.507	125.707
SNORD117	snorna	chr6	31504151	31504226	-1	1423.94	339.526	2508.34	2.83016	0.295099	9.59054	8.76267e-22	1.85949e-20	361.559	363.756	293.263	3154.8	2939.87	1430.37
SNORD111B	snorna	chr16	70563412	70563491	1	959.126	746.806	1171.44	0.646199	0.160673	4.02183	5.77487e-05	0.000261227	742.737	685.57	812.112	1300.12	1195.99	1018.23
SNORD111	snorna	chr19	35128601	35128686	-1	256.266	200.252	312.28	0.623289	0.17103	3.64432	0.000268099	0.00108063	187.786	191.411	221.558	286.8	335.772	314.267
SNORD105B	snorna	chr19	10220433	10220511	1	827.865	1021.6	634.134	-0.684281	0.1847	-3.70483	0.000211533	0.000867164	983.776	1041.7	1039.31	571.869	545.762	784.771
SNORD101	snorna	chr6	133136446	133136518	1	1979.33	1211.42	2747.24	1.17152	0.184586	6.34671	2.19971e-10	1.92375e-09	1188.38	1185.83	1260.06	2879.54	3211.68	2150.49
SNORD100	snorna	chr6	133137941	133138016	1	3676.28	6299.32	1053.23	-2.57032	0.138302	-18.5848	4.26367e-77	1.02541e-74	5941.9	7015.09	5940.98	997.74	1029.7	1132.26
SNORA80B	snorna	chr2	10586840	10586975	-1	49.0076	65.4674	32.5478	-0.991171	0.276733	-3.58169	0.000341381	0.00135706	61.6612	67.8707	66.8703	36.932	31.9783	28.733
SNORA80	snorna	chr21	33749496	33749631	-1	51.959	72.4205	31.4975	-1.17513	0.400012	-2.93774	0.00330616	0.0106018	64.464	76.2592	76.5383	20.1972	21.3188	52.9765
SNORA7B	snorna	chr3	129116053	129116191	-1	57.3057	27.8184	86.7931	1.55113	0.378031	4.10318	4.0751e-05	0.000192169	22.4222	32.0289	29.004	110.796	100.199	49.3849
SNORA77	snorna	chr22	20113925	20114049	1	1014.16	380.966	1647.35	2.0737	0.231565	8.95513	3.39325e-19	6.52861e-18	294.292	452.217	396.388	1851.79	1837.68	1252.58
SNORA76	snorna	chr22	34100772	34100906	-1	386.197	576.124	196.27	-1.54007	0.165894	-9.28342	1.64121e-20	3.43226e-19	552.148	585.671	590.553	226.785	183.342	178.683
SNORA75	snorna	chr16	23453162	23453242	1	256.59	211.19	301.989	0.507263	0.202328	2.50713	0.0121717	0.0334224	210.209	235.641	187.72	282.76	359.222	263.985
SNORA74B	snorna	chr5	172447731	172447931	1	73.5402	47.5586	99.5217	1.07032	0.249217	4.29473	1.74909e-05	8.8792e-05	50.4501	50.3311	41.8946	109.642	99.1326	89.7907
SNORA73B	snorna	chr1	28835071	28835274	1	410.485	494.696	326.275	-0.597232	0.201746	-2.96031	0.00307326	0.0100106	465.262	533.815	485.011	371.051	358.157	249.618
SNORA72	snorna	chr8	132445023	132445116	-1	29.0358	41.0284	17.0433	-1.18877	0.352227	-3.37501	0.000738127	0.00273809	44.8445	41.18	37.0607	20.7742	15.9891	14.3665
SNORA71D	snorna	chr20	37062508	37062641	-1	733.967	1029.75	438.183	-1.21564	0.264503	-4.59594	4.30808e-06	2.3283e-05	966.959	1109.57	1012.72	308.728	382.673	623.147
SNORA71C	snorna	chr20	37058313	37058446	-1	23.204	31.2588	15.1491	-1.00534	0.378904	-2.6533	0.00797092	0.0230502	30.8306	26.6907	36.255	16.1577	14.9232	14.3665
SNORA71B	snorna	chr20	37053846	37053979	-1	532.388	364.576	700.2	0.926786	0.196083	4.7265	2.28422e-06	1.29769e-05	327.925	391.972	373.829	844.242	679.005	577.354
SNORA71A	snorna	chr20	37055952	37056085	-1	251.533	365.197	137.868	-1.37516	0.180914	-7.60114	2.93525e-14	3.58946e-13	420.417	356.131	319.044	146.574	133.243	133.788
SNORA68	snorna	chr19	33099243	33099375	-1	67.3419	119.783	14.9003	-2.99297	0.336405	-8.89691	5.74219e-19	1.04886e-17	98.0973	138.792	122.461	11.5412	22.3848	10.7749
SNORA67	snorna	chr17	7481273	7481409	1	233.644	174.459	292.829	0.73285	0.237451	3.08633	0.00202646	0.00684822	162.561	187.598	173.218	362.395	300.596	215.498
SNORA66	snorna	chr1	93306276	93306408	1	586.769	250.626	922.912	1.89067	0.182754	10.3454	4.38874e-25	1.13089e-23	294.292	228.778	228.809	1061.79	860.215	846.726
SNORA65	snorna	chr9	130210780	130210909	-1	474.237	637.768	310.706	-1.03809	0.184301	-5.63261	1.77506e-08	1.25559e-07	563.359	690.909	659.035	309.305	362.42	260.393
SNORA64	snorna	chr16	2012974	2013107	-1	340.562	465.938	215.186	-1.12137	0.160219	-6.99899	2.57813e-12	2.71551e-11	412.009	519.325	466.481	211.205	220.65	213.702
SNORA63	snorna	chr15	78383514	78383639	-1	197.452	118.593	276.311	1.20706	0.208653	5.78501	7.25061e-09	5.42105e-08	117.717	135.741	102.32	298.918	292.068	237.945
SNORA60	snorna	chr20	37078013	37078146	1	33.7986	41.5846	26.0125	-0.702419	0.332257	-2.11409	0.0345079	0.0824419	30.8306	48.8059	45.1173	30.0072	25.5826	22.4477
SNORA5C	snorna	chr7	45144505	45144641	-1	120.926	72.2722	169.58	1.20062	0.376331	3.19034	0.00142107	0.00496513	78.4779	75.4966	62.842	227.362	201.463	79.9137
SNORA5A	snorna	chr7	45143948	45144081	-1	101.094	166.7	35.4878	-2.22658	0.251717	-8.84557	9.10586e-19	1.60241e-17	159.759	179.209	161.133	27.1219	36.242	43.0995
SNORA56	snorna	chrX	154003273	154003401	1	30.0288	18.0404	42.0172	1.21544	0.342177	3.55209	0.000382184	0.0015027	19.6195	16.777	17.7247	41.5485	40.5058	43.9974
SNORA55	snorna	chr1	40033046	40033180	-1	43.2204	60.5826	25.8582	-1.169	0.304364	-3.84078	0.000122642	0.000528274	70.0695	62.5326	49.1456	25.3907	23.4507	28.733
SNORA54	snorna	chr11	2985001	2985123	-1	114.665	93.9969	135.332	0.518888	0.212833	2.43801	0.0147685	0.0396114	95.2945	103.713	82.9836	129.262	149.232	127.503
SNORA52	snorna	chr11	811681	811814	1	9090.09	691.4	17488.8	4.60866	0.216339	21.3029	1.06635e-100	3.84685e-98	644.64	807.585	621.974	22337.5	15290.9	14837.9
SNORA51	snorna	chr21	41885071	41885206	1	46.5281	57.4293	35.6269	-0.667005	0.29836	-2.23557	0.02538	0.0636928	61.6612	52.6189	58.008	30.0072	31.9783	44.8953
SNORA50	snorna	chr16	58593700	58593835	-1	166.886	136.583	197.189	0.532	0.180793	2.94259	0.00325483	0.0104604	140.139	133.454	136.158	204.857	208.925	177.786
SNORA49	snorna	chr12	132515769	132515904	1	51.5348	40.4596	62.6101	0.611271	0.288671	2.11754	0.0342144	0.0821488	39.2389	43.4678	38.672	68.0933	70.3522	49.3849
SNORA46	snorna	chr16	58582403	58582537	-1	181.237	135.214	227.259	0.717392	0.176701	4.05992	4.9089e-05	0.000227767	120.52	144.13	140.992	216.398	240.903	224.477
SNORA45	snorna	chr11	8706986	8707116	1	471.273	573.687	368.858	-0.636457	0.166853	-3.81449	0.000136466	0.000582603	568.964	584.908	567.189	354.316	431.707	320.553
SNORA42	snorna	chr16	30430946	30431080	-1	98.9338	124.854	73.0132	-0.806545	0.235343	-3.4271	0.000610061	0.00228812	92.4918	141.08	140.992	70.4016	71.4181	77.22
SNORA41	snorna	chr15	45829448	45829575	1	72.6262	134.41	10.8426	-3.58069	0.320328	-11.1782	5.2137e-29	1.67186e-27	142.942	127.353	132.935	7.50181	10.6594	14.3665
SNORA4	snorna	chrX	81816650	81816796	1	55.6793	78.724	32.6347	-1.21894	0.386931	-3.15029	0.00163107	0.00565776	75.6751	96.8492	63.6476	44.4338	37.308	16.1623
SNORA38	snorna	chr12	119326239	119326369	-1	65.477	34.0878	96.8663	1.37532	0.349596	3.93402	8.35381e-05	0.000369771	19.6195	48.8059	33.838	70.9786	100.199	119.422
SNORA36B	snorna	chr1	220373888	220374018	-1	755.691	251.545	1259.84	2.28065	0.215485	10.5838	3.54351e-26	1.00261e-24	198.997	261.569	294.068	1408.61	1369.74	1001.17
SNORA36A	snorna	chrX	153996803	153996934	1	74.9053	58.4808	91.3298	0.698556	0.259964	2.68712	0.00720704	0.0211808	72.8723	52.6189	49.9513	105.602	88.4732	79.9137
SNORA32	snorna	chr21	42911133	42911253	1	60.953	48.2106	73.6954	0.621788	0.312206	1.9916	0.0464153	0.105292	50.4501	44.2303	49.9513	99.8317	62.8906	58.364
SNORA31	snorna	chr20	4849630	4849764	1	5053.91	2702.45	7405.36	1.40621	0.372298	3.77711	0.00015866	0.000663611	1664.85	3416.41	3026.08	4107.53	6621.63	11486.9
SNORA3	snorna	chr21	43302314	43302409	1	1535.34	2211.85	858.826	-1.34922	0.213312	-6.32512	2.53031e-10	2.18637e-09	2343.12	2313.7	1978.72	1017.94	932.699	625.841
SNORA28	snorna	chr14	103804186	103804311	1	53.7059	26.8554	80.5564	1.47869	0.311564	4.74603	2.07452e-06	1.19264e-05	19.6195	33.5541	27.3927	89.4446	88.4732	63.7514
SNORA25	snorna	chr18	75143519	75143645	-1	42.5897	20.8683	64.3112	1.62086	0.390639	4.14924	3.33574e-05	0.00015886	25.225	22.8778	14.502	80.2116	71.4181	41.3037
SNORA23	snorna	chr11	9450320	9450501	1	153.584	283.072	24.0953	-3.51822	0.250061	-14.0694	5.85325e-45	3.8392e-43	260.659	292.073	296.485	20.7742	19.187	32.3247
SNORA13	snorna	chr5	111497182	111497314	1	213.969	110.939	316.999	1.49749	0.26166	5.72304	1.04633e-08	7.62551e-08	114.914	107.525	110.376	381.438	354.959	214.6
SNORA12	snorna	chr10	101996913	101997059	-1	4.53679	7.35025	1.72333	-1.7704	0.751552	-2.35566	0.0184896	0.0479865	5.60556	8.38851	8.05666	2.30825	1.06594	1.79581
SNORA11B	snorna	chr14	91592769	91592897	1	5.87231	2.4738	9.27081	1.61304	0.763569	2.1125	0.0346434	0.0826287	2.80278	3.81296	0.805666	7.50181	14.9232	5.38744
SNORA11	snorna	chr21	35828408	35828535	-1	11.175	5.00504	17.3449	1.68974	0.565523	2.98792	0.00280881	0.00921703	5.60556	4.57555	4.834	19.0431	21.3188	11.6728
SNORA10	snorna	chr16	2012335	2012467	-1	69.6584	53.6312	85.6856	0.642314	0.293223	2.19053	0.0284857	0.0706269	47.6473	63.2952	49.9513	98.1006	97.0007	61.9556
SNORA1	snorna	chr16	24344736	24344868	-1	16.9576	23.0675	10.8477	-1.12419	0.445772	-2.52188	0.0116728	0.032392	16.8167	28.2159	24.17	8.07887	12.7913	11.6728
SNHG6	snorna	chr8	67834702	67834790	-1	479.664	565.104	394.224	-0.517132	0.159692	-3.2383	0.00120243	0.00428422	566.162	591.772	537.379	403.366	438.102	341.205
SNHG3	snorna	chr1	28833878	28834083	1	1386.51	1972.11	800.907	-1.29468	0.149193	-8.67789	4.03191e-18	6.76517e-17	1866.65	2103.99	1945.68	857.514	853.82	691.388
SNHG15	snorna	chr7	45024977	45025109	-1	37.4435	63.0469	11.8401	-2.23818	0.532954	-4.19957	2.67426e-05	0.000129931	70.0695	45.7555	73.3156	8.07887	3.19783	24.2435
SNHG12	snorna	chr1	28907432	28907566	-1	1183.98	1552.51	815.441	-0.929111	0.122416	-7.5898	3.2041e-14	3.88531e-13	1440.63	1628.13	1588.77	832.124	784.533	829.666
SCARNA9	snorna	chr11	93454963	93455032	1	740.455	1210.65	270.259	-2.13762	0.193872	-11.0259	2.86505e-28	8.79632e-27	1353.74	1259.04	1019.17	317.961	261.156	231.66
SCARNA8	snorna	chr9	19063654	19063784	-1	352.92	679.7	26.1395	-4.64188	0.256376	-18.1058	2.87043e-73	4.60225e-71	636.231	780.894	621.974	21.3513	20.2529	36.8142
SCARNA7	snorna	chr3	160232695	160233024	-1	168.733	54.8053	282.661	2.31635	0.238207	9.7241	2.37994e-22	5.36603e-21	50.4501	64.8203	49.1456	316.23	297.398	234.354
SCARNA6	snorna	chr16	21598948	21599185	1	390.661	474.131	307.191	-0.616103	0.188636	-3.2661	0.00109041	0.00391408	504.501	452.217	465.675	287.954	260.09	373.529
SCARNA3	snorna	chr1	175937534	175937676	-1	278.46	118.629	438.292	1.86692	0.243385	7.67066	1.71109e-14	2.18504e-13	123.322	118.964	113.599	521.664	480.74	312.472
SCARNA21	snorna	chr17	7809440	7809578	1	2.6819	4.7652	0.598605	-2.09923	0.954137	-2.20014	0.027797	0.0692765	5.60556	3.05037	5.63966	0	0	1.79581
SCARNA20	snorna	chr17	58308877	58309007	-1	19.8257	28.6701	10.9812	-1.37678	0.44062	-3.12465	0.00178019	0.00611622	28.0278	28.9785	29.004	6.34768	14.9232	11.6728
SCARNA2	snorna	chr1	109642815	109643234	1	2802.88	3348.47	2257.3	-0.567994	0.134708	-4.21647	2.48153e-05	0.000121178	3038.21	3588.76	3418.44	2447.32	2131.88	2192.69
SCARNA18	snorna	chr22	21899414	21899496	1	127.424	167.397	87.4507	-0.910959	0.228116	-3.9934	6.51315e-05	0.000291878	182.181	154.044	165.967	84.2511	70.3522	107.749
SCARNA17	snorna	chr22	21899186	21899328	1	2.96051	0.537111	5.3839	2.14191	0.93372	2.29395	0.0217932	0.0557914	0	0	1.61133	5.77062	3.19783	7.18326
SCARNA15	snorna	chr20	41933195	41933319	1	1162.49	733.494	1591.48	1.10646	0.189417	5.84137	5.17723e-09	3.93197e-08	703.498	754.966	742.019	1697.72	1843.01	1233.72
SCARNA11	snorna	chr12	8750105	8750236	1	298.372	434.849	161.895	-1.38606	0.315725	-4.39009	1.13305e-05	5.88125e-05	459.656	432.39	412.501	231.402	166.287	87.9949
SCARNA10	snorna	chr12	6619388	6619717	1	240.115	163.797	316.434	0.946059	0.28821	3.28254	0.00102877	0.00372996	193.392	158.619	139.38	330.657	415.717	202.927
RNU105B	snorna	chr20	8811833	8812040	1	5.6202	10.2786	0.96177	-2.52661	0.815283	-3.09906	0.00194136	0.0065915	11.2111	9.15111	10.4737	2.88531	0	0
MIR3607	snorna	chr5	85916323	85916385	1	462.427	249.632	675.222	1.42154	0.179037	7.9399	2.02339e-15	2.91975e-14	241.039	251.655	256.202	754.22	712.049	559.396
MEG8	snorna	chr14	101364257	101364333	1	44.7888	59.1603	30.4174	-0.93159	0.388828	-2.3959	0.0165798	0.043738	47.6473	54.9066	74.927	43.2797	30.9123	17.0602
LINC00338	snorna	chr17	75085389	75085575	1	86.1257	124.795	47.4562	-1.35683	0.278911	-4.86473	1.14615e-06	6.80617e-06	154.153	109.051	111.182	39.2402	61.8246	41.3037
RNVU1-6	snrna	chr1	145382757	145382920	1	20.927	30.5894	11.2645	-1.40129	0.404817	-3.46154	0.000537095	0.00204493	25.225	34.3166	32.2267	12.6954	8.52754	12.5707
RNVU1-17	snrna	chr1	149194106	149194269	-1	8.97111	15.5349	2.40735	-2.38564	0.635578	-3.75349	0.000174389	0.000725195	11.2111	15.2518	20.1417	3.46237	1.06594	2.69372
RNU7-1	snrna	chr12	7052979	7053041	1	272.871	409.434	136.309	-1.56323	0.283866	-5.50695	3.65109e-08	2.50882e-07	392.389	420.188	415.724	94.6382	114.056	200.233
RNU6-920P	snrna	chr17	27968629	27968720	-1	1.72873	3.26511	0.192354	-2.24346	1.01222	-2.21638	0.0266652	0.0666861	2.80278	4.57555	2.417	0.577062	0	0
RNU6-31P	snrna	chr2	201694732	201694839	1	3.14493	5.08757	1.20228	-1.78106	0.863855	-2.06176	0.0392309	0.0916785	2.80278	7.62592	4.834	0.577062	2.13188	0.897907
RNU6-23P	snrna	chr16	70479196	70479302	-1	32.612	56.3933	8.83057	-2.57971	0.425152	-6.06775	1.29715e-09	1.03414e-08	33.6334	67.8707	67.676	10.3871	5.32971	10.7749
RNU6-222P	snrna	chr19	55380394	55380500	-1	30.2515	56.6745	3.8286	-3.73755	0.456451	-8.18829	2.64972e-16	3.90157e-15	53.2528	57.957	58.8136	3.46237	5.32971	2.69372
RNU6-180P	snrna	chr1	229518875	229518935	1	3.76898	6.44769	1.09026	-1.96425	0.857762	-2.28997	0.0220228	0.0561464	8.40834	6.10074	4.834	0.577062	0	2.69372
RNU6-1163P	snrna	chr6	113292695	113292801	1	5.96135	0	11.9227	4.04933	0.97115	4.16963	3.05095e-05	0.000146263	0	0	0	6.92475	6.39565	22.4477
RNU6-1128P	snrna	chr22	31618731	31618839	-1	5.33789	10.6758	0	-4.30045	0.955064	-4.50279	6.70679e-06	3.57118e-05	14.0139	9.15111	8.86233	0	0	0
RNU6-1067P	snrna	chr10	28956848	28956954	1	5.25977	9.92094	0.598605	-3.18654	0.868632	-3.66846	0.000244016	0.000989089	5.60556	14.4893	9.668	0	0	1.79581
RNU5F-1	snrna	chr1	45187458	45187574	-1	256.992	404.986	108.998	-1.87491	0.252291	-7.43155	1.07333e-13	1.2592e-12	400.798	420.188	393.971	76.1722	104.462	146.359
RNU5E-6P	snrna	chr1	45285555	45285669	-1	142.123	216.182	68.0647	-1.64602	0.268603	-6.12807	8.89524e-10	7.29309e-09	210.209	227.252	211.085	54.8209	53.2971	96.076
RNU5E-1	snrna	chr1	11968209	11968328	1	2159.9	3462.45	857.343	-1.97294	0.299607	-6.58509	4.54599e-11	4.3157e-10	3301.68	3469.03	3616.64	613.994	624.642	1333.39
RNU5D-1	snrna	chr1	45196727	45196842	-1	96.8051	149.743	43.8671	-1.75396	0.27422	-6.39621	1.59286e-10	1.41012e-09	156.956	160.144	132.129	31.1614	44.7696	55.6702
RNU5B-1	snrna	chr15	65597015	65597130	1	605.153	791.253	419.053	-0.911483	0.160251	-5.68783	1.28661e-08	9.32951e-08	790.384	737.427	845.95	440.875	456.223	360.061
RNU2-70P	snrna	chr1	236431080	236431258	1	10.0301	16.8059	3.25432	-2.18366	0.587813	-3.71488	0.000203301	0.000837864	11.2111	19.0648	20.1417	4.03943	2.13188	3.59163
RNU2-68P	snrna	chrX	71596829	71597019	-1	219.464	284.584	154.343	-0.863287	0.33059	-2.61135	0.0090185	0.0257697	257.856	290.548	305.348	187.545	198.265	77.22
RNU2-59P	snrna	chr10	103124602	103124792	-1	736.794	462.183	1011.41	1.08161	0.40068	2.69943	0.00694582	0.0204966	291.489	396.548	698.513	651.503	726.972	1655.74
RNU2-2P	snrna	chr11	62609091	62609281	-1	659.081	521.847	796.314	0.593332	0.251461	2.35954	0.0182977	0.0476126	423.22	658.117	484.205	656.697	696.06	1036.18
RNU2-29P	snrna	chr7	53843829	53844017	1	42.1143	77.7736	6.45492	-3.5074	0.394692	-8.88644	6.30973e-19	1.13812e-17	61.6612	84.6477	87.012	6.34768	8.52754	4.48953
RNU12	snrna	chr22	43011250	43011399	1	2895.07	1927.6	3862.55	0.995153	0.179262	5.55138	2.83431e-08	1.9758e-07	1863.85	2065.1	1853.84	4674.78	3690.29	3222.59
RNU1-85P	snrna	chr17	56756888	56757051	-1	17.8613	32.6583	3.06426	-3.20134	0.607937	-5.2659	1.39503e-07	8.86797e-07	33.6334	30.5037	33.838	1.73119	7.46159	0
RNU1-83P	snrna	chr12	63244518	63244681	-1	7.64985	14.3458	0.953919	-3.35445	0.787916	-4.25737	2.06843e-05	0.000103278	11.2111	21.3526	10.4737	0	1.06594	1.79581
RNU1-67P	snrna	chrX	118557705	118557868	1	76.4019	121.589	31.2152	-1.85763	0.491356	-3.78061	0.000156442	0.000656236	92.4918	143.367	128.907	21.9284	10.6594	61.0577
RNU1-59P	snrna	chr1	144534038	144534199	1	34.6317	46.1063	23.1571	-0.99314	0.35892	-2.76702	0.00565704	0.0170776	33.6334	57.957	46.7286	26.5449	15.9891	26.9372
RNU1-20P	snrna	chr3	192447344	192447505	-1	4.32977	7.67623	0.983313	-2.33675	0.837538	-2.79002	0.00527042	0.0161813	5.60556	5.33815	12.085	1.15412	0	1.79581
RNU1-16P	snrna	chr13	114133230	114133393	-1	55.9123	110.678	1.14627	-6.04521	0.583383	-10.3623	3.67906e-25	9.6525e-24	103.703	108.288	120.044	0.577062	1.06594	1.79581
RNU1-136P	snrna	chr6	53084059	53084222	1	3.9855	7.03862	0.932376	-2.2377	0.854499	-2.61873	0.00882577	0.0253697	5.60556	10.6763	4.834	1.73119	1.06594	0
RNU1-122P	snrna	chr1	147806736	147806886	-1	19.4147	31.1212	7.70814	-1.86857	0.480186	-3.89134	9.9693e-05	0.000433304	42.0417	32.7915	18.5303	6.34768	9.59348	7.18326
RNU1-120P	snrna	chr1	147735751	147735907	1	7.79914	14.615	0.983313	-3.25235	0.753726	-4.31503	1.59581e-05	8.16577e-05	8.40834	14.4893	20.9473	1.15412	0	1.79581
